# Supplementary material
Source: publisher site journal article supplement (https://www.dovepress.com/article/506143)
Supplement: Supplementary file 1 [file get_supplementary_file.php]

A

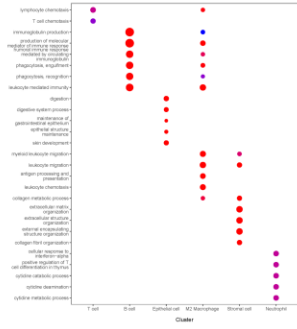

B

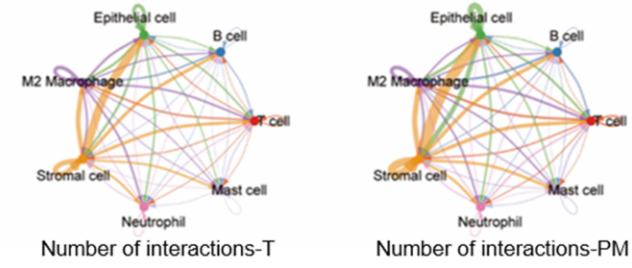

C

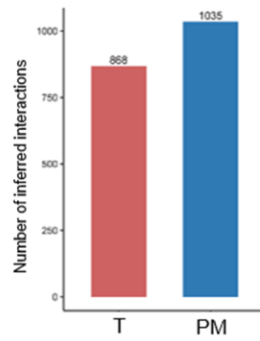

D

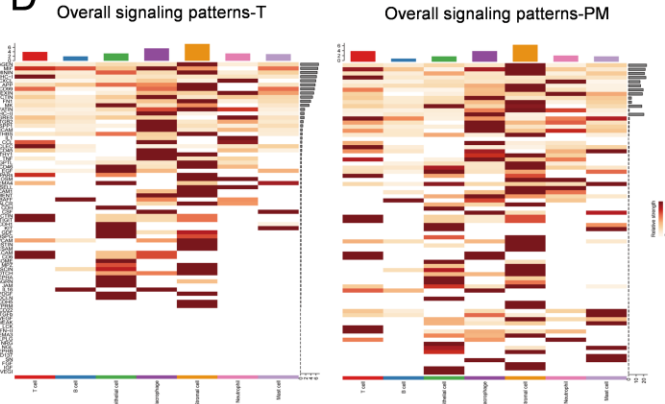

E

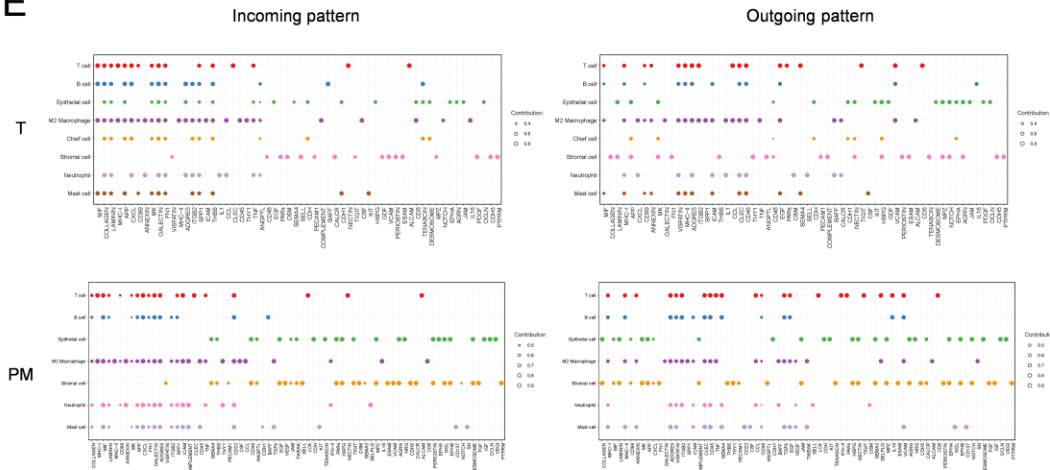

F

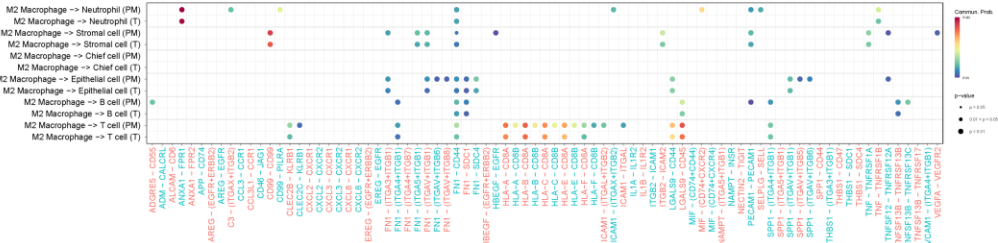

2 **Fig. S1: Cellular communication among distinct cell types within T and PM from GC**  
3 **patients.** (A) Bubble plot of functional validation of M2 macrophage classification. (B) Overview of  
4 the intercellular communication networks among distinct cell types. Nodes with different colors  
5 represent different cell populations, and the line width represent the interactions or interaction  
6 strength. (C) Bar plot of the overall difference of inferred cellular interactions (the total number of  
7 interactions) among different specimen of GC patients. (D) Heatmaps reveals the relative  
8 strength of signaling pathways among distinct cell types in the overall signaling patterns, and  
9 gradual change in the color from white to dark red indicates the change in the relative interaction  
10 strength from high to low. (E) Dot plot for the incoming and outgoing strength of distinct cell types  
11 under T and PM, respectively. (F) Dot plot for the discrepancy of ligand–receptors pairs within M2  
12 macrophages among T and PM. T, Primary Tumor; PM, Peritoneal Metastasis; GC, Gastric  
13 Cancer.



- 15 **Fig. S2: Ligand–receptors pairs within distinct cell types from T and PM of GC patients.**
- 16 Dot plot for the discrepancy of ligand–receptors pairs from B cells (A), Epithelial cells (B), T cells
- 17 (C), Neutrophils (D) and Stromal cells (E). T, Primary Tumor; PM, Peritoneal Metastasis.

A

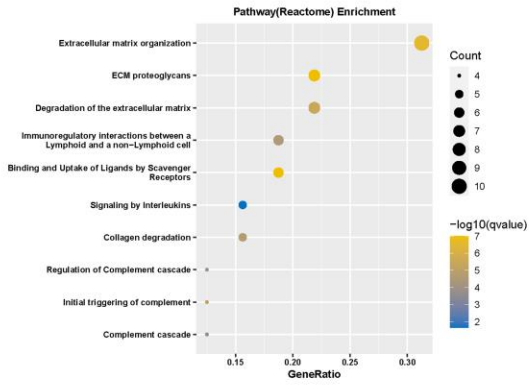

B

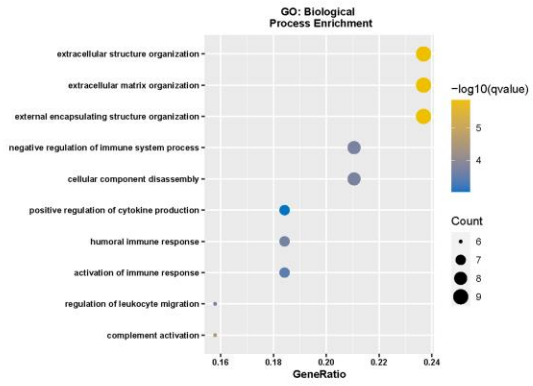

C

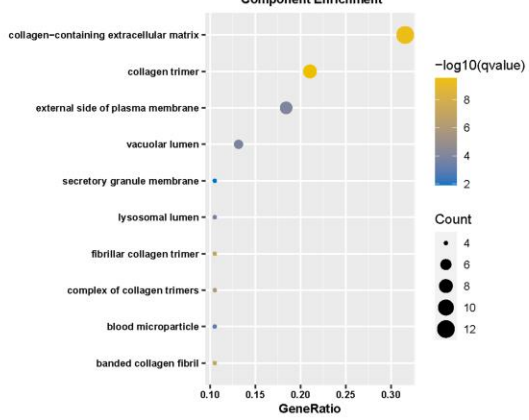

D

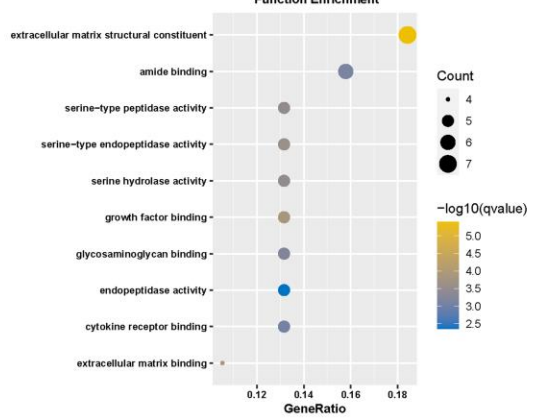

19 **Fig. S3: GO and KEGG analysis of M2 macrophage-related genes.** (A) Bubble plot of the  
20 reactome pathway analysis of M2 macrophage-related genes. (B-D) Bubble plot of the Gene  
21 Ontology (GO) function of M2 macrophage-related genes in biological process (BP), cellular  
22 component (CC) and molecular function (MF). WGCNA, Weighted Gene Correlation Network  
23 Analysis; GC, Gastric Cancer.

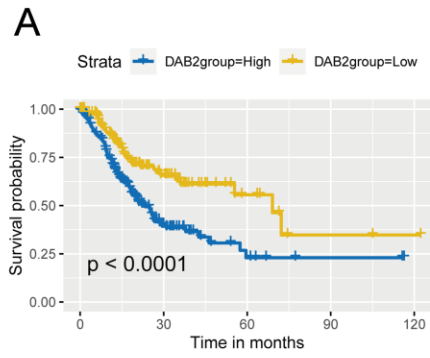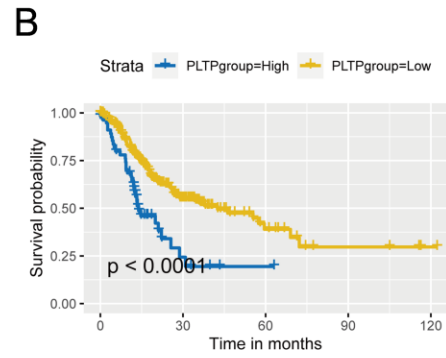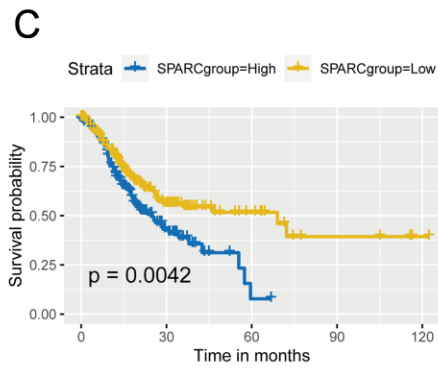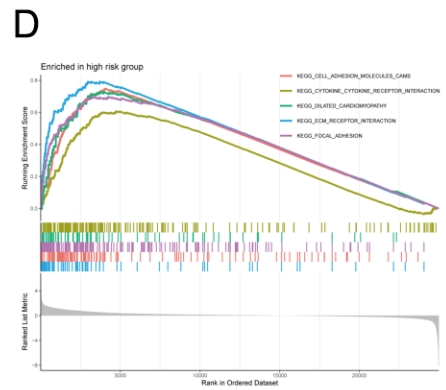

25 **Fig. S4: The expression levels and K-M survival analysis of the three prognostic genes**  
26 **related to M2 macrophages.** (A-C) K-M survival analysis of four prognostic genes, including  
27 DAB2 (A), PLTP (B) and SPARC (C). (D) GSEA showing the enriched pathways in high- and low-  
28 risk groups. K-M, Kaplan–Meier; GSEA, Gene Set Enrichment Analysis.

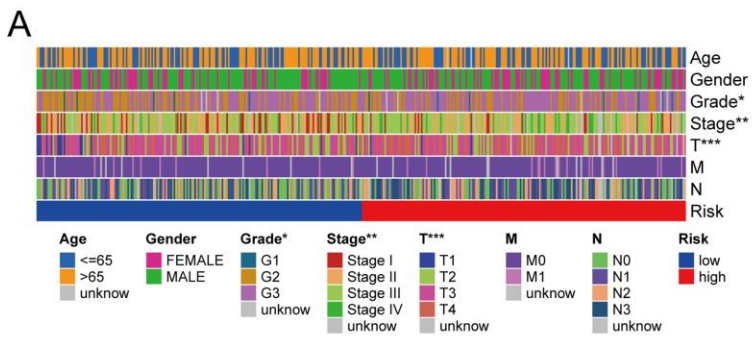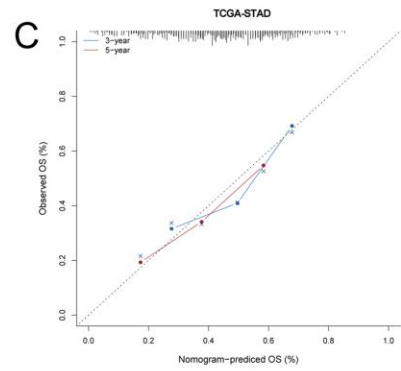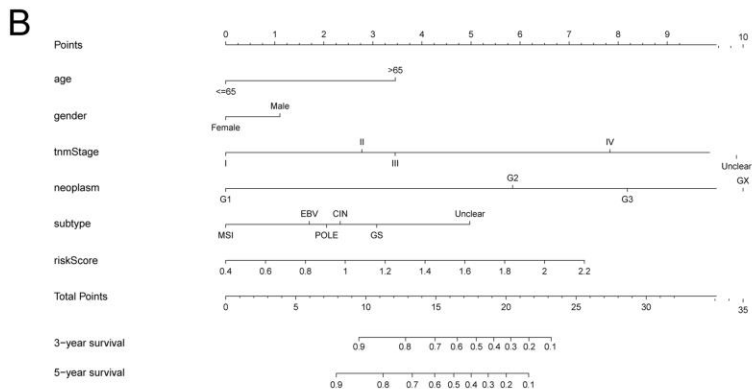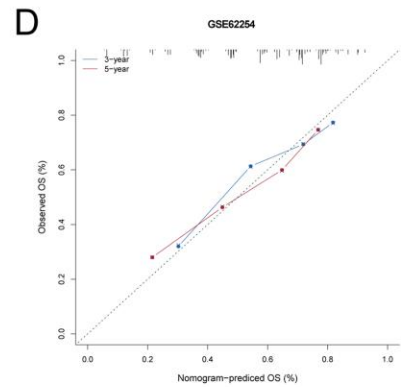

30 **Fig. S5: Construction and verification of a nomogram utilizing an M2 macrophage-related**  
31 **signature to evaluate its prognostic predictive capability in GC patients.** (A) A heatmap  
32 showing the association between risk-Score and clinical characteristics. (B) Prognostic  
33 nomogram with risk score for predicting 3- and 5-year OS in GC patients was constructed. (C)  
34 The calibration curve for 3- and 5-year OS in the TCGA-STAD cohort. (D) The calibration curve  
35 for 3- and 5-year OS in the GSE62254 cohort. GC, Gastric cancer; OS, Overall Survival; \*p <  
36 0.05; \*\*p < 0.01; \*\*\*p < 0.001.



38 **Fig. S6: Correlation between M2 macrophage-related signature and immune landscape and**  
39 **immunotherapy in IMvigor210 cohort.** (A) Kaplan–Meier survival analysis of high- and low-risk  
40 groups in IMvigor210 cohort. (B) A heatmap showing the landscape of 28 tumor-infiltrating  
41 immune cell types among high- and low-risk groups identified by ssGSEA. (C) Box plots showing  
42 the difference of infiltrating immune cell among high- and low-risk groups. (D) Box plots showing  
43 the difference of 28 tumor-infiltrating immune cell types or pathways in different risk groups. (E)  
44 Box plots showing the relationship between risk-Score the expression levels of  
45 immunosuppression checkpoint genes. (F) Box plots showing the response rate to  
46 immunotherapy among high- and low-risk groups. (G) Box plots showing the relationship between  
47 riskScore and the scores of TIDE, Dysfunction, Exclusion and IPS. ssGSEA, Single Sample Gene  
48 Set Enrichment Analysis; \*p < 0.05; \*\*p < 0.01; \*\*\*p < 0.001; \*\*\*\*p < 0.0001; Not Statistically  
49 Significant.

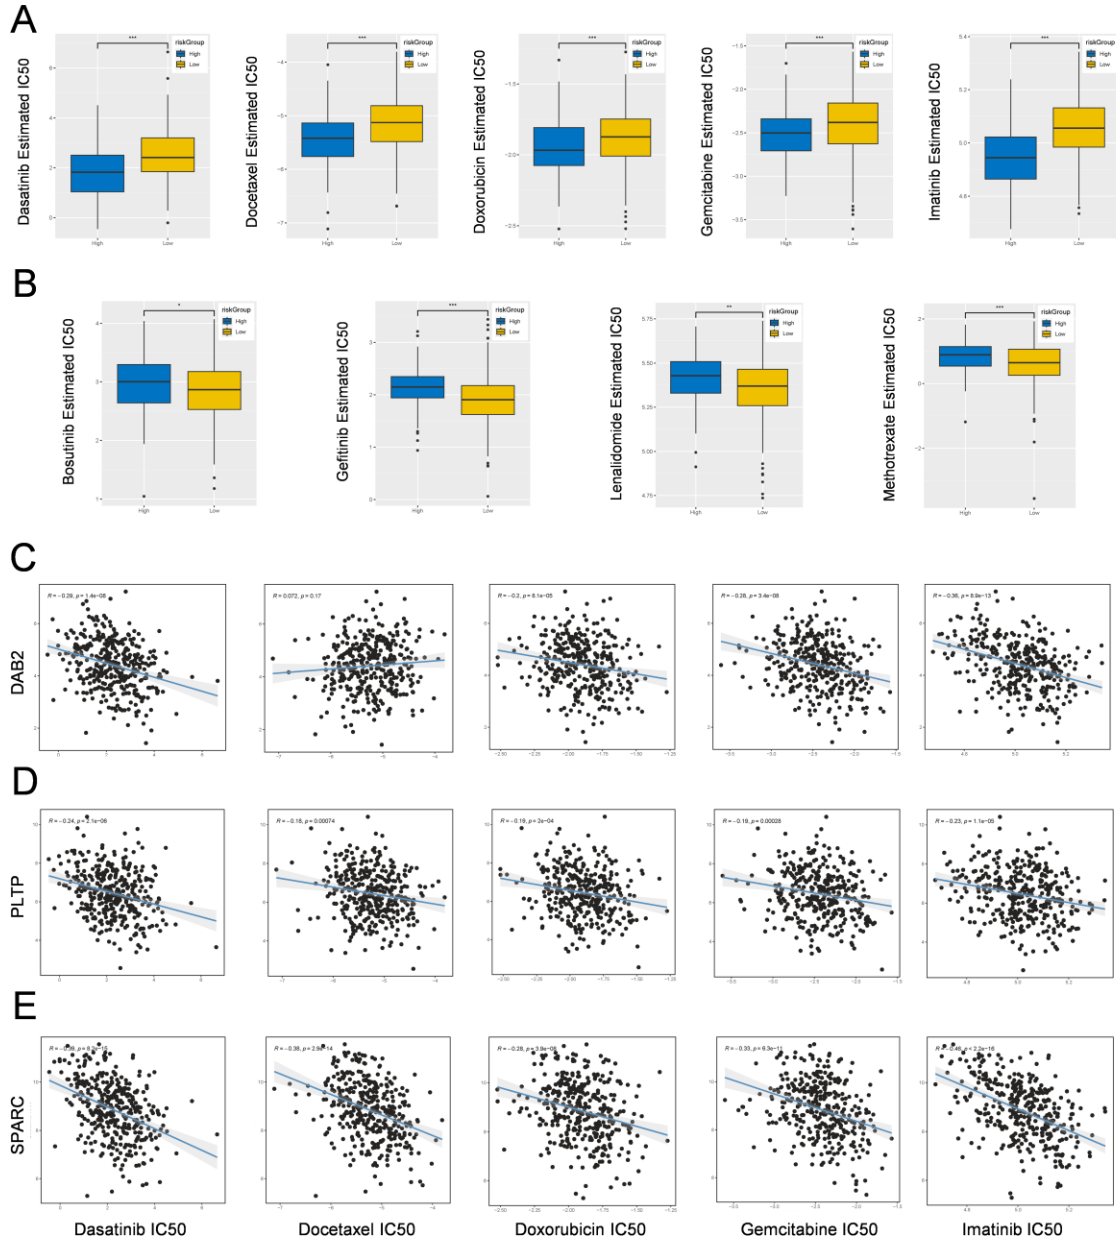

51 **Fig. S7: Drug sensitivity analysis based on high- and low-risk groups.** (A, B) The box chart  
52 shows the difference in chemotherapy drug IC50 between high-risk and low-risk groups. (C-E)  
53 The dot plot shows the correlation between the expression levels of individual genes and the  
54 chemotherapeutic drug IC50. IC50, Half maximal inhibitory concentration; \*p < 0.05; \*\*p < 0.01;  
55 \*\*\*p < 0.001.

Table S1 Differential expression genes (DEGs) of M2 macrophage subpopulation

| gene     | p_val | avg_log2F | pct.1 | pct.2 | p_val_adj |
|----------|-------|-----------|-------|-------|-----------|
| CCL18    | 0     | 2.455827  | 0.252 | 0.05  | 0         |
| FABP4    | 0     | -0.33753  | 0.232 | 0.083 | 0         |
| SPP1     | 0     | 4.918206  | 0.387 | 0.152 | 0         |
| MMP9     | 0     | 2.047661  | 0.36  | 0.103 | 0         |
| APOC1    | 0     | 3.768105  | 0.554 | 0.213 | 0         |
| CCL3L1   | 0     | 2.194695  | 0.526 | 0.165 | 0         |
| IGFBP3   | 0     | -1.02733  | 0.071 | 0.276 | 0         |
| LTF      | 0     | -0.68095  | 0.045 | 0.196 | 0         |
| EREG     | 0     | 2.394456  | 0.391 | 0.114 | 0         |
| CFD      | 0     | 0.939569  | 0.627 | 0.247 | 0         |
| SERPINA1 | 0     | 1.529563  | 0.69  | 0.195 | 0         |
| ACP5     | 0     | 1.935677  | 0.561 | 0.311 | 0         |
| CCL4L2   | 0     | 1.712089  | 0.591 | 0.264 | 0         |
| CCL20    | 0     | 2.546478  | 0.426 | 0.233 | 0         |
| IL1A     | 0     | 1.282799  | 0.296 | 0.054 | 0         |
| APOE     | 0     | 3.868439  | 0.623 | 0.267 | 0         |
| MARCO    | 0     | 1.925248  | 0.281 | 0.039 | 0         |
| HAMP     | 0     | 1.564673  | 0.367 | 0.088 | 0         |
| HMOX1    | 0     | 2.136856  | 0.624 | 0.212 | 0         |
| S100B    | 0     | 0.540177  | 0.246 | 0.056 | 0         |
| GPNMB    | 0     | 2.215109  | 0.501 | 0.09  | 0         |
| SPINK1   | 0     | -1.91911  | 0.148 | 0.365 | 0         |
| CCL3     | 0     | 3.481966  | 0.69  | 0.224 | 0         |
| C1QB     | 0     | 4.637265  | 0.706 | 0.239 | 0         |
| FCER1A   | 0     | 0.443959  | 0.196 | 0.007 | 0         |
| CD1C     | 0     | 0.465317  | 0.269 | 0.041 | 0         |
| C1QC     | 0     | 4.632196  | 0.703 | 0.238 | 0         |
| C1QA     | 0     | 4.284933  | 0.707 | 0.227 | 0         |
| DNASE1L3 | 0     | 0.93044   | 0.273 | 0.037 | 0         |
| IL10     | 0     | 0.606914  | 0.289 | 0.093 | 0         |
| IL1B     | 0     | 3.625203  | 0.684 | 0.148 | 0         |
| IL1RN    | 0     | 1.769056  | 0.402 | 0.146 | 0         |
| SDS      | 0     | 1.249274  | 0.375 | 0.087 | 0         |
| PGC      | 0     | -4.72119  | 0.343 | 0.592 | 0         |
| TREM2    | 0     | 1.547275  | 0.468 | 0.016 | 0         |
| LIPF     | 0     | -4.12494  | 0.268 | 0.474 | 0         |
| CD163    | 0     | 1.856347  | 0.557 | 0.054 | 0         |
| PLA2G7   | 0     | 1.339327  | 0.382 | 0.022 | 0         |
| CD1E     | 0     | 0.416063  | 0.243 | 0.037 | 0         |
| PTGS2    | 0     | 1.102439  | 0.397 | 0.113 | 0         |
| ADAMDEC  | 0     | 0.702712  | 0.277 | 0.037 | 0         |
| CTSL     | 0     | 3.141735  | 0.703 | 0.269 | 0         |
| AC020656 | 0     | 0.429815  | 0.262 | 0.071 | 0         |
| TIMP1    | 0     | 2.48745   | 0.84  | 0.546 | 0         |
| TGFBI    | 0     | 1.331453  | 0.57  | 0.195 | 0         |
| THBS1    | 0     | 1.49627   | 0.463 | 0.3   | 0         |
| MSR1     | 0     | 1.304282  | 0.443 | 0.021 | 0         |
| TNF      | 0     | 1.203199  | 0.475 | 0.275 | 0         |
| FCN1     | 0     | 1.835142  | 0.338 | 0.045 | 0         |
| F13A1    | 0     | 1.354083  | 0.389 | 0.052 | 0         |
| RETN     | 0     | 0.814556  | 0.234 | 0.033 | 0         |
| LYVE1    | 0     | 0.624346  | 0.261 | 0.014 | 0         |
| VCAN     | 0     | 1.310683  | 0.379 | 0.139 | 0         |
| FABP3    | 0     | 0.261293  | 0.23  | 0.054 | 0         |
| FCGR3A   | 0     | 2.105286  | 0.542 | 0.093 | 0         |
| LGALS2   | 0     | 0.907326  | 0.355 | 0.145 | 0         |

|          |   |          |       |       |   |
|----------|---|----------|-------|-------|---|
| MS4A7    | 0 | 2.584755 | 0.751 | 0.126 | 0 |
| CLEC10A  | 0 | 1.205613 | 0.446 | 0.056 | 0 |
| MS4A6A   | 0 | 2.77914  | 0.753 | 0.121 | 0 |
| C15orf48 | 0 | 2.12431  | 0.625 | 0.262 | 0 |
| MRC1     | 0 | 1.349688 | 0.425 | 0.051 | 0 |
| CD14     | 0 | 2.759453 | 0.713 | 0.126 | 0 |
| OLR1     | 0 | 1.833514 | 0.523 | 0.04  | 0 |
| LIPA     | 0 | 1.776519 | 0.595 | 0.277 | 0 |
| LYZ      | 0 | 1.906842 | 0.861 | 0.417 | 0 |
| IL4I1    | 0 | 0.917885 | 0.354 | 0.169 | 0 |
| EBI3     | 0 | 0.670988 | 0.332 | 0.074 | 0 |
| ADIRF    | 0 | -1.10207 | 0.155 | 0.361 | 0 |
| PLTP     | 0 | 2.150673 | 0.515 | 0.286 | 0 |
| VSIG4    | 0 | 1.510507 | 0.512 | 0.062 | 0 |
| MS4A4A   | 0 | 1.788424 | 0.562 | 0.068 | 0 |
| CXCL3    | 0 | 3.200893 | 0.579 | 0.267 | 0 |
| CD93     | 0 | 0.51949  | 0.374 | 0.085 | 0 |
| FOLR2    | 0 | 1.719831 | 0.468 | 0.092 | 0 |
| CPVL     | 0 | 1.926947 | 0.668 | 0.129 | 0 |
| PDIA2    | 0 | -0.40066 | 0.01  | 0.228 | 0 |
| CYP27A1  | 0 | 0.960189 | 0.356 | 0.146 | 0 |
| MMP19    | 0 | 1.275623 | 0.382 | 0.084 | 0 |
| MDK      | 0 | -0.98632 | 0.161 | 0.361 | 0 |
| CD68     | 0 | 3.159896 | 0.843 | 0.269 | 0 |
| CTSB     | 0 | 3.588079 | 0.898 | 0.451 | 0 |
| OLFML2B  | 0 | 0.399913 | 0.332 | 0.042 | 0 |
| FCGR2B   | 0 | 1.900756 | 0.507 | 0.075 | 0 |
| CSF1R    | 0 | 1.75005  | 0.638 | 0.078 | 0 |
| IGFBP2   | 0 | -1.13556 | 0.203 | 0.4   | 0 |
| HLA-DQA  | 0 | 1.074788 | 0.39  | 0.11  | 0 |
| FBP1     | 0 | 0.923766 | 0.43  | 0.246 | 0 |
| S100A14  | 0 | -0.73063 | 0.065 | 0.228 | 0 |
| STAB1    | 0 | 1.599766 | 0.511 | 0.066 | 0 |
| CXCL2    | 0 | 2.96846  | 0.67  | 0.265 | 0 |
| LGMN     | 0 | 2.156105 | 0.628 | 0.312 | 0 |
| LILRB4   | 0 | 1.354446 | 0.53  | 0.062 | 0 |
| CLU      | 0 | -1.16251 | 0.174 | 0.39  | 0 |
| NLRP3    | 0 | 1.101018 | 0.421 | 0.112 | 0 |
| CYBB     | 0 | 1.892363 | 0.649 | 0.065 | 0 |
| CCL4     | 0 | 1.599874 | 0.717 | 0.377 | 0 |
| TMIGD3   | 0 | 0.44798  | 0.278 | 0.031 | 0 |
| TMEM176  | 0 | 1.246462 | 0.647 | 0.258 | 0 |
| FPR3     | 0 | 1.009307 | 0.393 | 0.049 | 0 |
| CLDN18   | 0 | -1.23453 | 0.14  | 0.34  | 0 |
| IFI30    | 0 | 1.791003 | 0.663 | 0.176 | 0 |
| ASS1     | 0 | -0.49831 | 0.051 | 0.266 | 0 |
| PLIN2    | 0 | 1.975292 | 0.688 | 0.432 | 0 |
| CTSD     | 0 | 1.747376 | 0.623 | 0.401 | 0 |
| LAMA3    | 0 | -0.35606 | 0.036 | 0.163 | 0 |
| FCGR1A   | 0 | 1.134383 | 0.428 | 0.048 | 0 |
| IGSF6    | 0 | 1.476866 | 0.589 | 0.053 | 0 |
| C19orf33 | 0 | -1.11078 | 0.14  | 0.363 | 0 |
| RASSF4   | 0 | 1.248047 | 0.517 | 0.195 | 0 |
| SLCO2B1  | 0 | 1.008318 | 0.37  | 0.128 | 0 |
| FCER1G   | 0 | 3.30364  | 0.909 | 0.178 | 0 |
| MAFB     | 0 | 1.851042 | 0.722 | 0.253 | 0 |
| FCGR2A   | 0 | 1.97352  | 0.705 | 0.08  | 0 |
| VMO1     | 0 | 0.988767 | 0.43  | 0.067 | 0 |

|          |   |          |       |       |   |
|----------|---|----------|-------|-------|---|
| CTSZ     | 0 | 1.906023 | 0.667 | 0.242 | 0 |
| AIF1     | 0 | 2.96553  | 0.892 | 0.159 | 0 |
| S100A16  | 0 | -0.82464 | 0.1   | 0.304 | 0 |
| S100P    | 0 | -2.0395  | 0.148 | 0.352 | 0 |
| AKR7A3   | 0 | -0.61938 | 0.107 | 0.301 | 0 |
| MIR3945H | 0 | 0.613615 | 0.243 | 0.017 | 0 |
| PERP     | 0 | -0.86444 | 0.148 | 0.415 | 0 |
| MPEG1    | 0 | 1.18422  | 0.449 | 0.062 | 0 |
| PLPP1    | 0 | -0.87724 | 0.145 | 0.385 | 0 |
| KRT19    | 0 | -2.23532 | 0.172 | 0.403 | 0 |
| LILRB5   | 0 | 0.6129   | 0.272 | 0.011 | 0 |
| DAB2     | 0 | 1.362365 | 0.487 | 0.194 | 0 |
| CD86     | 0 | 1.430182 | 0.592 | 0.084 | 0 |
| TYROBP   | 0 | 3.362637 | 0.957 | 0.26  | 0 |
| CD24     | 0 | -1.31257 | 0.088 | 0.317 | 0 |
| GPR34    | 0 | 0.826912 | 0.398 | 0.166 | 0 |
| ADAP2    | 0 | 0.992424 | 0.448 | 0.11  | 0 |
| MCTP1    | 0 | 0.5062   | 0.343 | 0.104 | 0 |
| FXD3     | 0 | -1.0224  | 0.079 | 0.296 | 0 |
| AGR2     | 0 | -2.59235 | 0.197 | 0.422 | 0 |
| FGL2     | 0 | 1.526108 | 0.565 | 0.1   | 0 |
| KRT18    | 0 | -2.27903 | 0.204 | 0.457 | 0 |
| KRT8     | 0 | -2.42705 | 0.179 | 0.481 | 0 |
| C1orf54  | 0 | 0.699746 | 0.433 | 0.248 | 0 |
| IL18     | 0 | 0.805686 | 0.476 | 0.213 | 0 |
| LRP1     | 0 | 0.594929 | 0.435 | 0.234 | 0 |
| RAB25    | 0 | -0.3798  | 0.046 | 0.178 | 0 |
| HIST1H4C | 0 | -0.89296 | 0.379 | 0.577 | 0 |
| PPIC     | 0 | -0.39728 | 0.101 | 0.302 | 0 |
| BCAT1    | 0 | 0.636381 | 0.326 | 0.097 | 0 |
| CD209    | 0 | 0.388723 | 0.254 | 0.009 | 0 |
| HLA-DPA1 | 0 | 3.544838 | 0.941 | 0.422 | 0 |
| TNFAIP2  | 0 | 1.007817 | 0.492 | 0.172 | 0 |
| HLA-DPB1 | 0 | 3.357664 | 0.927 | 0.393 | 0 |
| ADM      | 0 | 0.484283 | 0.441 | 0.26  | 0 |
| MUC1     | 0 | -1.3057  | 0.098 | 0.341 | 0 |
| IGHA1    | 0 | -4.65812 | 0.337 | 0.535 | 0 |
| S100A9   | 0 | 2.53375  | 0.613 | 0.125 | 0 |
| CCL24    | 0 | 0.929225 | 0.269 | 0.059 | 0 |
| JCHAIN   | 0 | -3.95625 | 0.295 | 0.488 | 0 |
| S100A8   | 0 | 1.537579 | 0.479 | 0.164 | 0 |
| G0S2     | 0 | 2.088196 | 0.568 | 0.178 | 0 |
| MZB1     | 0 | -1.5868  | 0.114 | 0.34  | 0 |
| FUCA1    | 0 | 0.978705 | 0.395 | 0.226 | 0 |
| C5AR1    | 0 | 1.839379 | 0.631 | 0.091 | 0 |
| CST3     | 0 | 2.368523 | 0.951 | 0.63  | 0 |
| SLC16A10 | 0 | 0.713508 | 0.275 | 0.076 | 0 |
| CD320    | 0 | -0.87931 | 0.139 | 0.377 | 0 |
| FTL      | 0 | 3.066659 | 0.999 | 0.959 | 0 |
| CXCL8    | 0 | 2.804722 | 0.712 | 0.178 | 0 |
| CPM      | 0 | 0.647791 | 0.367 | 0.162 | 0 |
| BCL2A1   | 0 | 2.134174 | 0.738 | 0.2   | 0 |
| NQO1     | 0 | -0.90251 | 0.173 | 0.368 | 0 |
| CSTB     | 0 | 1.749174 | 0.818 | 0.55  | 0 |
| HLA-DRB5 | 0 | 2.570859 | 0.711 | 0.231 | 0 |
| PLEK     | 0 | 1.524469 | 0.71  | 0.179 | 0 |
| TREM1    | 0 | 0.947111 | 0.43  | 0.055 | 0 |
| TMEM176I | 0 | 1.511784 | 0.694 | 0.257 | 0 |

|          |           |          |       |       |           |
|----------|-----------|----------|-------|-------|-----------|
| KYNU     | 0         | 1.161136 | 0.492 | 0.126 | 0         |
| MISP     | 0         | -0.37764 | 0.06  | 0.202 | 0         |
| HLA-DQA  | 0         | 3.010746 | 0.825 | 0.27  | 0         |
| C12orf75 | 0         | -0.64853 | 0.16  | 0.382 | 0         |
| PIGR     | 0         | -1.4404  | 0.077 | 0.326 | 0         |
| HLA-DQB1 | 0         | 2.715951 | 0.804 | 0.247 | 0         |
| TSPAN8   | 0         | -1.28457 | 0.108 | 0.322 | 0         |
| PLD4     | 0         | 0.5198   | 0.305 | 0.036 | 0         |
| ACSL1    | 0         | 0.987501 | 0.503 | 0.169 | 0         |
| S100A10  | 0         | 0.640657 | 0.878 | 0.73  | 0         |
| SPI1     | 0         | 2.029625 | 0.778 | 0.144 | 0         |
| NRP2     | 0         | 0.560628 | 0.332 | 0.103 | 0         |
| ID1      | 0         | -1.31606 | 0.237 | 0.48  | 0         |
| SMIM25   | 0         | 0.840681 | 0.413 | 0.056 | 0         |
| SLC11A1  | 0         | 1.111875 | 0.412 | 0.081 | 0         |
| SMS      | 0         | 0.586584 | 0.556 | 0.335 | 0         |
| KCTD12   | 0         | 0.989939 | 0.512 | 0.171 | 0         |
| AKR1C1   | 0         | -0.26893 | 0.043 | 0.204 | 0         |
| CFP      | 0         | 0.900622 | 0.386 | 0.126 | 0         |
| AQP9     | 0         | 0.742886 | 0.286 | 0.062 | 0         |
| GPR183   | 0         | 1.45574  | 0.606 | 0.252 | 0         |
| RNASET2  | 0         | 1.489817 | 0.783 | 0.457 | 0         |
| HLA-DOA  | 0         | 0.558552 | 0.367 | 0.081 | 0         |
| PLAUR    | 0         | 2.641096 | 0.806 | 0.296 | 0         |
| CD163L1  | 0         | 0.401332 | 0.253 | 0.047 | 0         |
| EPHA2    | 0         | -0.33072 | 0.062 | 0.168 | 0         |
| PRCP     | 9.82E-308 | 0.401987 | 0.486 | 0.32  | 1.96E-304 |
| CD300E   | 9.31E-284 | 0.921726 | 0.243 | 0.04  | 1.86E-280 |
| FABP5    | 2.93E-283 | 0.649256 | 0.628 | 0.48  | 5.86E-280 |
| TACSTD2  | 1.41E-282 | -0.45973 | 0.076 | 0.207 | 2.82E-279 |
| TMEM37   | 3.38E-279 | 0.250099 | 0.26  | 0.121 | 6.76E-276 |
| MMP12    | 1.93E-277 | 2.214191 | 0.239 | 0.07  | 3.87E-274 |
| LCN2     | 2.89E-273 | -1.38565 | 0.063 | 0.242 | 5.78E-270 |
| GZMA     | 5.36E-269 | -1.50096 | 0.16  | 0.339 | 1.07E-265 |
| TMEM54   | 4.49E-268 | -0.39143 | 0.102 | 0.245 | 8.99E-265 |
| CLDN4    | 4.00E-267 | -1.41104 | 0.073 | 0.243 | 8.00E-264 |
| NRP1     | 5.56E-266 | 0.452743 | 0.323 | 0.119 | 1.11E-262 |
| SLC40A1  | 3.19E-263 | 1.317539 | 0.385 | 0.235 | 6.37E-260 |
| CH25H    | 3.96E-263 | 0.766032 | 0.304 | 0.169 | 7.92E-260 |
| SDC2     | 3.07E-258 | 0.304184 | 0.304 | 0.136 | 6.13E-255 |
| NR1H3    | 1.63E-256 | 0.445449 | 0.295 | 0.139 | 3.27E-253 |
| PGA3     | 8.26E-255 | -4.72142 | 0.272 | 0.442 | 1.65E-251 |
| SELENOP  | 1.05E-253 | 2.442699 | 0.494 | 0.377 | 2.10E-250 |
| AKR1B10  | 1.45E-246 | -0.70091 | 0.108 | 0.27  | 2.89E-243 |
| TM4SF1   | 4.37E-243 | -1.246   | 0.116 | 0.306 | 8.73E-240 |
| CDC42EP5 | 7.47E-243 | -0.30443 | 0.033 | 0.138 | 1.49E-239 |
| CA9      | 6.95E-241 | -0.3938  | 0.016 | 0.187 | 1.39E-237 |
| CXCL17   | 1.25E-240 | -0.75281 | 0.138 | 0.317 | 2.50E-237 |
| FMOD     | 6.59E-238 | -0.26806 | 0.052 | 0.181 | 1.32E-234 |
| COL5A1   | 4.59E-237 | -0.49791 | 0.031 | 0.206 | 9.17E-234 |
| CRIP2    | 1.23E-233 | -0.96707 | 0.175 | 0.34  | 2.46E-230 |
| SLC2A5   | 2.54E-233 | 0.465357 | 0.252 | 0.076 | 5.08E-230 |
| MMP14    | 5.96E-233 | 0.488353 | 0.353 | 0.183 | 1.19E-229 |
| PGA4     | 1.38E-232 | -0.99061 | 0.012 | 0.156 | 2.76E-229 |
| SFN      | 1.43E-228 | -0.87421 | 0.115 | 0.247 | 2.85E-225 |
| REG1A    | 2.06E-223 | -1.97664 | 0.225 | 0.377 | 4.13E-220 |
| PRSS23   | 1.52E-221 | -0.90569 | 0.155 | 0.298 | 3.03E-218 |
| CALD1    | 4.00E-221 | -1.63124 | 0.112 | 0.281 | 7.99E-218 |

|           |           |          |       |       |           |
|-----------|-----------|----------|-------|-------|-----------|
| S100A12   | 4.42E-220 | 0.675865 | 0.205 | 0.042 | 8.84E-217 |
| EPCAM     | 2.47E-216 | -0.94562 | 0.069 | 0.248 | 4.94E-213 |
| IGHA2     | 2.63E-214 | -3.70886 | 0.274 | 0.423 | 5.27E-211 |
| DKK3      | 3.70E-211 | -0.40191 | 0.055 | 0.228 | 7.40E-208 |
| FSTL1     | 4.07E-208 | -0.59001 | 0.045 | 0.207 | 8.13E-205 |
| ADH1C     | 2.66E-206 | -0.58519 | 0.085 | 0.238 | 5.31E-203 |
| SOD3      | 8.85E-205 | -0.6434  | 0.074 | 0.163 | 1.77E-201 |
| PSMB3     | 1.13E-204 | 0.35589  | 0.678 | 0.526 | 2.26E-201 |
| TINAGL1   | 9.31E-204 | -0.46205 | 0.116 | 0.24  | 1.86E-200 |
| LGALS4    | 1.25E-203 | -1.26301 | 0.144 | 0.297 | 2.50E-200 |
| PDZK1IP1  | 2.23E-203 | -0.49788 | 0.031 | 0.158 | 4.47E-200 |
| ADAMTS1   | 9.41E-200 | -0.49676 | 0.031 | 0.17  | 1.88E-196 |
| TNFAIP6   | 1.38E-199 | 0.828649 | 0.265 | 0.103 | 2.75E-196 |
| GPX2      | 4.58E-199 | -0.9926  | 0.108 | 0.26  | 9.15E-196 |
| THAP2     | 1.95E-198 | 0.638485 | 0.416 | 0.288 | 3.90E-195 |
| CLIC3     | 9.33E-198 | -0.41953 | 0.151 | 0.309 | 1.87E-194 |
| HES4      | 2.77E-197 | 0.382475 | 0.374 | 0.245 | 5.53E-194 |
| AZGP1     | 6.98E-197 | -0.46641 | 0.013 | 0.178 | 1.40E-193 |
| VSIG2     | 2.08E-196 | -0.85348 | 0.15  | 0.305 | 4.15E-193 |
| TNFRSF17  | 5.45E-195 | -0.28716 | 0.008 | 0.104 | 1.09E-191 |
| IGLV8-61  | 5.68E-195 | -0.75203 | 0.127 | 0.044 | 1.14E-191 |
| PGA5      | 1.32E-193 | -2.89452 | 0.207 | 0.348 | 2.63E-190 |
| C2        | 1.47E-193 | 0.485529 | 0.29  | 0.127 | 2.93E-190 |
| VWA1      | 1.71E-192 | -0.43256 | 0.039 | 0.13  | 3.43E-189 |
| ALDH1A1   | 5.46E-192 | -0.32233 | 0.206 | 0.342 | 1.09E-188 |
| SPRY1     | 2.86E-190 | -0.81573 | 0.15  | 0.318 | 5.73E-187 |
| TM4SF5    | 4.66E-190 | -0.29371 | 0.069 | 0.197 | 9.32E-187 |
| SERPINH1  | 1.18E-188 | -0.76344 | 0.26  | 0.413 | 2.36E-185 |
| ID3       | 5.30E-188 | -1.04482 | 0.345 | 0.499 | 1.06E-184 |
| ARL14     | 5.86E-186 | -0.43553 | 0.075 | 0.185 | 1.17E-182 |
| FHL2      | 3.63E-185 | -0.53192 | 0.086 | 0.245 | 7.25E-182 |
| PRSS3     | 6.29E-179 | -0.36607 | 0.048 | 0.154 | 1.26E-175 |
| CAV1      | 6.83E-179 | -0.91103 | 0.098 | 0.236 | 1.37E-175 |
| HOPX      | 2.75E-178 | -0.62626 | 0.156 | 0.304 | 5.51E-175 |
| MAL2      | 5.68E-178 | -0.42622 | 0.049 | 0.159 | 1.14E-174 |
| FBXO32    | 4.98E-172 | -0.3511  | 0.16  | 0.3   | 9.95E-169 |
| CAVIN1    | 6.00E-172 | -0.71791 | 0.128 | 0.258 | 1.20E-168 |
| CKB       | 3.82E-170 | -0.82226 | 0.198 | 0.316 | 7.64E-167 |
| AKR1C3    | 2.19E-169 | -0.42678 | 0.141 | 0.273 | 4.39E-166 |
| LINC02446 | 1.20E-168 | -0.31311 | 0.03  | 0.158 | 2.39E-165 |
| EFNA1     | 1.88E-163 | -0.42377 | 0.079 | 0.215 | 3.77E-160 |
| CTSE      | 5.51E-163 | -0.90306 | 0.15  | 0.282 | 1.10E-159 |
| IGLC3     | 8.38E-163 | -4.36716 | 0.129 | 0.279 | 1.68E-159 |
| HPGD      | 6.57E-162 | -0.5773  | 0.196 | 0.327 | 1.31E-158 |
| IFIT2     | 1.14E-160 | 0.30411  | 0.22  | 0.107 | 2.27E-157 |
| C1S       | 1.48E-159 | -0.944   | 0.081 | 0.194 | 2.96E-156 |
| NFIB      | 1.58E-158 | -0.50073 | 0.104 | 0.261 | 3.16E-155 |
| CD248     | 2.52E-158 | -0.29437 | 0.024 | 0.148 | 5.04E-155 |
| CLEC5A    | 4.32E-158 | 0.576492 | 0.204 | 0.032 | 8.64E-155 |
| PSCA      | 1.01E-157 | -1.52455 | 0.209 | 0.352 | 2.03E-154 |
| JSRP1     | 1.93E-157 | -0.3743  | 0.03  | 0.175 | 3.86E-154 |
| MUC6      | 2.02E-155 | -1.84003 | 0.209 | 0.342 | 4.03E-152 |
| MYL9      | 2.19E-155 | -1.16858 | 0.175 | 0.299 | 4.38E-152 |
| TFF1      | 7.08E-154 | -3.38156 | 0.353 | 0.475 | 1.42E-150 |
| KCNE2     | 2.57E-152 | -0.43819 | 0.048 | 0.173 | 5.14E-149 |
| MAP1B     | 1.67E-151 | -0.34625 | 0.037 | 0.109 | 3.34E-148 |
| MT1E      | 3.08E-150 | -0.94181 | 0.349 | 0.496 | 6.16E-147 |
| CDHR5     | 6.67E-150 | -0.32131 | 0.096 | 0.192 | 1.33E-146 |

|           |           |          |       |       |           |
|-----------|-----------|----------|-------|-------|-----------|
| FAM167B   | 4.21E-148 | -0.30796 | 0.026 | 0.136 | 8.41E-145 |
| NID1      | 9.60E-147 | -0.2766  | 0.115 | 0.19  | 1.92E-143 |
| IL6       | 1.27E-145 | 0.836502 | 0.22  | 0.079 | 2.54E-142 |
| LAMP3     | 6.89E-145 | 0.458567 | 0.221 | 0.115 | 1.38E-141 |
| TFF2      | 8.87E-144 | -2.80891 | 0.295 | 0.414 | 1.77E-140 |
| SULT1C2   | 8.63E-142 | -0.52837 | 0.071 | 0.198 | 1.73E-138 |
| SPARCL1   | 1.59E-141 | -1.73747 | 0.14  | 0.273 | 3.17E-138 |
| CLDN7     | 4.78E-141 | -0.58412 | 0.13  | 0.226 | 9.55E-138 |
| TPM1      | 1.01E-138 | -1.09018 | 0.233 | 0.383 | 2.02E-135 |
| THBD      | 2.36E-138 | 0.546632 | 0.325 | 0.178 | 4.72E-135 |
| MGP       | 7.82E-138 | -1.81504 | 0.157 | 0.285 | 1.56E-134 |
| MMP10     | 8.43E-138 | 0.395417 | 0.158 | 0.042 | 1.69E-134 |
| IFNG      | 1.52E-135 | -0.93551 | 0.099 | 0.226 | 3.03E-132 |
| CAPN8     | 4.07E-135 | -0.8484  | 0.181 | 0.301 | 8.14E-132 |
| ITLN1     | 3.42E-134 | -0.39647 | 0.071 | 0.129 | 6.84E-131 |
| GZMK      | 5.01E-134 | -0.65952 | 0.121 | 0.257 | 1.00E-130 |
| ALDH3A1   | 6.03E-134 | -0.52512 | 0.095 | 0.179 | 1.21E-130 |
| DERL3     | 3.77E-133 | -0.91611 | 0.155 | 0.302 | 7.55E-130 |
| FOXQ1     | 3.88E-133 | -0.30052 | 0.028 | 0.152 | 7.75E-130 |
| IGHV2-5   | 6.85E-133 | -1.52243 | 0.1   | 0.21  | 1.37E-129 |
| FN1       | 1.50E-130 | 1.57508  | 0.272 | 0.152 | 3.00E-127 |
| GPRC5A    | 2.90E-129 | -0.53998 | 0.098 | 0.2   | 5.81E-126 |
| WFDC2     | 2.92E-128 | -0.3967  | 0.069 | 0.176 | 5.84E-125 |
| MUC4      | 3.93E-128 | -0.28223 | 0.061 | 0.101 | 7.86E-125 |
| RARRES2   | 4.46E-128 | -1.3234  | 0.17  | 0.285 | 8.91E-125 |
| IGKC      | 1.46E-127 | -4.72916 | 0.253 | 0.395 | 2.93E-124 |
| LMCD1     | 1.58E-127 | -0.32715 | 0.136 | 0.262 | 3.16E-124 |
| MUC17     | 5.02E-127 | -0.27848 | 0.094 | 0.176 | 1.00E-123 |
| SDCBP2    | 2.45E-126 | -0.52531 | 0.112 | 0.229 | 4.90E-123 |
| LMO7      | 2.45E-126 | -0.59101 | 0.088 | 0.226 | 4.90E-123 |
| CTGF      | 4.43E-126 | -1.32109 | 0.119 | 0.263 | 8.87E-123 |
| TMC5      | 5.34E-126 | -0.66308 | 0.081 | 0.217 | 1.07E-122 |
| INHBA     | 2.38E-124 | 1.203571 | 0.2   | 0.042 | 4.76E-121 |
| COL6A1    | 2.68E-124 | -0.923   | 0.072 | 0.197 | 5.35E-121 |
| CD9       | 2.68E-122 | 0.414145 | 0.503 | 0.403 | 5.37E-119 |
| KLK11     | 4.34E-122 | -0.30196 | 0.042 | 0.132 | 8.69E-119 |
| IGKV1D-10 | 1.34E-120 | -0.41066 | 0.106 | 0.042 | 2.69E-117 |
| CYR61     | 1.09E-119 | -1.20365 | 0.175 | 0.306 | 2.17E-116 |
| PLA2G2A   | 1.24E-119 | -0.99952 | 0.121 | 0.208 | 2.47E-116 |
| IGLC2     | 9.17E-119 | -4.87228 | 0.158 | 0.302 | 1.83E-115 |
| EFEMP1    | 6.38E-118 | -0.61756 | 0.099 | 0.183 | 1.28E-114 |
| MUC5AC    | 4.80E-117 | -2.50581 | 0.359 | 0.467 | 9.60E-114 |
| LSR       | 1.71E-115 | -0.60643 | 0.163 | 0.309 | 3.41E-112 |
| CCL22     | 1.80E-115 | 0.974893 | 0.113 | 0.023 | 3.59E-112 |
| ERO1A     | 1.04E-114 | 0.312906 | 0.285 | 0.181 | 2.08E-111 |
| FSCN1     | 2.27E-114 | 0.506804 | 0.373 | 0.289 | 4.54E-111 |
| MXRA8     | 2.73E-111 | -0.32239 | 0.017 | 0.107 | 5.46E-108 |
| ANXA10    | 6.88E-111 | -0.86828 | 0.221 | 0.334 | 1.38E-107 |
| IL33      | 2.87E-109 | -0.25271 | 0.024 | 0.149 | 5.74E-106 |
| EDN1      | 1.47E-108 | -0.30379 | 0.07  | 0.162 | 2.93E-105 |
| IGHV3-72  | 2.89E-107 | -0.941   | 0.108 | 0.043 | 5.77E-104 |
| MXRA5     | 4.92E-107 | -0.34514 | 0.042 | 0.105 | 9.85E-104 |
| TPM2      | 1.62E-106 | -0.92441 | 0.157 | 0.285 | 3.25E-103 |
| CDH1      | 5.46E-106 | -0.40903 | 0.073 | 0.186 | 1.09E-102 |
| TSPAN1    | 1.65E-105 | -0.69479 | 0.12  | 0.217 | 3.30E-102 |
| SLCO2A1   | 3.36E-105 | -0.41343 | 0.03  | 0.148 | 6.72E-102 |
| DMKN      | 9.25E-105 | -0.2812  | 0.099 | 0.204 | 1.85E-101 |
| GKN1      | 1.23E-104 | -2.78075 | 0.288 | 0.382 | 2.46E-101 |

|           |           |          |       |       |           |
|-----------|-----------|----------|-------|-------|-----------|
| GOLM1     | 4.85E-104 | -0.597   | 0.173 | 0.288 | 9.69E-101 |
| PHLDA2    | 6.31E-104 | 0.259326 | 0.492 | 0.38  | 1.26E-100 |
| PHGR1     | 7.80E-104 | -1.95578 | 0.281 | 0.378 | 1.56E-100 |
| GZMB      | 3.80E-103 | -0.81021 | 0.149 | 0.255 | 7.60E-100 |
| CCL19     | 1.05E-102 | 0.381398 | 0.129 | 0.035 | 2.10E-99  |
| PTX3      | 4.67E-100 | 0.682752 | 0.209 | 0.065 | 9.35E-97  |
| GIF       | 3.98E-98  | -0.62756 | 0.065 | 0.198 | 7.96E-95  |
| MYC       | 5.48E-98  | -0.44686 | 0.228 | 0.336 | 1.10E-94  |
| EPAS1     | 9.80E-98  | -0.50124 | 0.236 | 0.35  | 1.96E-94  |
| IGLL5     | 1.02E-97  | -1.23745 | 0.099 | 0.181 | 2.05E-94  |
| CNN3      | 2.60E-97  | -0.64959 | 0.119 | 0.259 | 5.20E-94  |
| KCNMA1    | 3.22E-97  | 0.396711 | 0.228 | 0.094 | 6.43E-94  |
| IGFBP6    | 5.19E-97  | -0.55485 | 0.138 | 0.237 | 1.04E-93  |
| PRSS8     | 1.52E-96  | -0.3992  | 0.084 | 0.192 | 3.04E-93  |
| AREG      | 1.62E-95  | 0.983532 | 0.529 | 0.453 | 3.24E-92  |
| IGKV3-15  | 1.76E-95  | -2.82174 | 0.174 | 0.265 | 3.51E-92  |
| KRT7      | 3.17E-94  | -0.56806 | 0.099 | 0.188 | 6.34E-91  |
| IGHV1-69I | 1.12E-93  | -2.00569 | 0.123 | 0.223 | 2.23E-90  |
| SPON2     | 2.01E-93  | -0.70226 | 0.192 | 0.296 | 4.03E-90  |
| OLFM4     | 6.43E-91  | -0.51854 | 0.075 | 0.159 | 1.29E-87  |
| DUOX2     | 1.79E-88  | -0.29957 | 0.05  | 0.14  | 3.58E-85  |
| DSG2      | 4.85E-88  | -0.32134 | 0.084 | 0.161 | 9.69E-85  |
| CXCL5     | 1.05E-87  | 1.443559 | 0.168 | 0.077 | 2.10E-84  |
| NSG1      | 1.81E-87  | -0.26806 | 0.055 | 0.176 | 3.63E-84  |
| PTPRF     | 4.51E-87  | -0.27618 | 0.087 | 0.168 | 9.02E-84  |
| CXCL9     | 8.22E-85  | 1.273005 | 0.153 | 0.036 | 1.64E-81  |
| CXCL1     | 4.06E-83  | 0.940656 | 0.243 | 0.153 | 8.13E-80  |
| CAMK2N1   | 7.10E-83  | -0.27952 | 0.056 | 0.167 | 1.42E-79  |
| MUCL3     | 8.67E-83  | -1.15857 | 0.28  | 0.37  | 1.73E-79  |
| REG4      | 1.53E-82  | -1.02998 | 0.196 | 0.28  | 3.06E-79  |
| FABP1     | 2.26E-82  | -0.87968 | 0.17  | 0.269 | 4.51E-79  |
| CRYAB     | 1.26E-81  | -0.25391 | 0.06  | 0.137 | 2.52E-78  |
| TESC      | 2.55E-81  | -0.44673 | 0.279 | 0.375 | 5.09E-78  |
| CFH       | 2.60E-81  | -0.51884 | 0.103 | 0.203 | 5.19E-78  |
| DCN       | 6.28E-81  | -1.73455 | 0.106 | 0.216 | 1.26E-77  |
| COL6A2    | 1.85E-80  | -1.19559 | 0.121 | 0.242 | 3.71E-77  |
| SMIM24    | 1.01E-79  | -0.58899 | 0.21  | 0.289 | 2.01E-76  |
| GSTA1     | 7.20E-79  | -0.43132 | 0.1   | 0.192 | 1.44E-75  |
| GKN2      | 7.94E-79  | -1.80539 | 0.23  | 0.321 | 1.59E-75  |
| RGS5      | 1.28E-78  | -1.53576 | 0.162 | 0.24  | 2.57E-75  |
| LINC01133 | 3.01E-77  | -0.40338 | 0.114 | 0.198 | 6.01E-74  |
| IGHG1     | 6.47E-77  | -2.55088 | 0.169 | 0.261 | 1.29E-73  |
| MFAP2     | 7.75E-77  | -0.27701 | 0.079 | 0.128 | 1.55E-73  |
| IGKV1D-3  | 1.77E-76  | -1.33934 | 0.081 | 0.152 | 3.55E-73  |
| ID4       | 1.88E-76  | -0.26597 | 0.052 | 0.136 | 3.76E-73  |
| UACA      | 4.23E-76  | -0.25569 | 0.131 | 0.177 | 8.46E-73  |
| MSMB      | 4.34E-76  | -0.75089 | 0.107 | 0.19  | 8.69E-73  |
| COL4A1    | 1.93E-74  | -1.04329 | 0.099 | 0.195 | 3.86E-71  |
| AC245595  | 2.25E-74  | -0.27601 | 0.156 | 0.231 | 4.51E-71  |
| IFI6      | 2.54E-74  | 0.469441 | 0.517 | 0.445 | 5.08E-71  |
| IGLV3-10  | 3.23E-74  | -2.38985 | 0.11  | 0.196 | 6.46E-71  |
| FAM3B     | 3.78E-74  | -0.36284 | 0.144 | 0.215 | 7.55E-71  |
| FAM3D     | 4.52E-74  | -0.40836 | 0.13  | 0.184 | 9.04E-71  |
| LAMA4     | 5.11E-74  | -0.47368 | 0.055 | 0.125 | 1.02E-70  |
| MT1G      | 1.47E-73  | -0.88984 | 0.318 | 0.431 | 2.94E-70  |
| NNMT      | 3.59E-72  | -0.95919 | 0.167 | 0.249 | 7.19E-69  |
| IGFBP7    | 4.05E-69  | -2.66854 | 0.283 | 0.375 | 8.11E-66  |
| ESAM      | 1.37E-67  | -0.44727 | 0.16  | 0.237 | 2.74E-64  |

|           |          |          |       |       |          |
|-----------|----------|----------|-------|-------|----------|
| PLAC9     | 4.67E-67 | -0.45705 | 0.075 | 0.134 | 9.34E-64 |
| IGFBP4    | 8.46E-67 | -1.51874 | 0.225 | 0.326 | 1.69E-63 |
| F2R       | 1.99E-66 | -0.37571 | 0.099 | 0.214 | 3.98E-63 |
| IGLV1-40  | 5.00E-66 | -2.91955 | 0.168 | 0.258 | 1.00E-62 |
| PDLIM3    | 1.32E-65 | -0.30229 | 0.075 | 0.165 | 2.64E-62 |
| LIFR      | 2.40E-65 | -0.25236 | 0.027 | 0.156 | 4.80E-62 |
| IGKV3-11  | 2.68E-65 | -2.78447 | 0.189 | 0.267 | 5.35E-62 |
| CYGB      | 1.27E-64 | -0.48392 | 0.084 | 0.168 | 2.54E-61 |
| CPE       | 2.10E-64 | -0.33616 | 0.024 | 0.103 | 4.20E-61 |
| XCL2      | 3.28E-63 | -0.8975  | 0.13  | 0.201 | 6.55E-60 |
| RASD1     | 1.51E-62 | -0.33515 | 0.279 | 0.366 | 3.02E-59 |
| CLDN3     | 2.19E-62 | -0.50883 | 0.113 | 0.175 | 4.38E-59 |
| RCAN1     | 3.47E-62 | 0.425641 | 0.272 | 0.19  | 6.93E-59 |
| IGHV3-23  | 1.48E-61 | -2.40748 | 0.141 | 0.214 | 2.96E-58 |
| IGLV1-44  | 3.81E-61 | -3.03696 | 0.196 | 0.274 | 7.61E-58 |
| SERINC2   | 5.05E-61 | -0.28198 | 0.187 | 0.233 | 1.01E-57 |
| AGR3      | 2.06E-60 | -0.37691 | 0.108 | 0.171 | 4.12E-57 |
| TNIP3     | 2.11E-60 | 0.580502 | 0.192 | 0.103 | 4.22E-57 |
| IGFBP5    | 1.03E-59 | -1.24009 | 0.069 | 0.158 | 2.05E-56 |
| GATM      | 2.10E-59 | 0.29658  | 0.295 | 0.181 | 4.20E-56 |
| PCSK1N    | 1.89E-58 | -0.72516 | 0.189 | 0.265 | 3.79E-55 |
| CAVIN2    | 3.40E-58 | -0.41897 | 0.185 | 0.107 | 6.80E-55 |
| GSTM3     | 6.47E-58 | -0.41956 | 0.268 | 0.364 | 1.29E-54 |
| GNG11     | 1.27E-57 | -0.89815 | 0.141 | 0.236 | 2.54E-54 |
| COL3A1    | 2.04E-57 | -2.05195 | 0.161 | 0.26  | 4.07E-54 |
| GDF15     | 3.11E-57 | -0.44436 | 0.202 | 0.266 | 6.22E-54 |
| RGS16     | 1.10E-56 | -0.40086 | 0.225 | 0.314 | 2.20E-53 |
| BMP4      | 1.87E-56 | -0.26612 | 0.06  | 0.119 | 3.74E-53 |
| CEACAM5   | 2.53E-56 | -0.36908 | 0.114 | 0.166 | 5.05E-53 |
| COL1A2    | 1.78E-55 | -1.95774 | 0.145 | 0.246 | 3.55E-52 |
| VWF       | 4.60E-55 | -0.75654 | 0.181 | 0.118 | 9.20E-52 |
| APOBEC3/  | 1.19E-54 | 0.584406 | 0.156 | 0.07  | 2.38E-51 |
| ZG16B     | 2.69E-54 | -0.31798 | 0.115 | 0.163 | 5.38E-51 |
| ANXA3     | 2.61E-53 | -0.37599 | 0.123 | 0.187 | 5.22E-50 |
| THY1      | 2.81E-53 | -0.74947 | 0.093 | 0.192 | 5.62E-50 |
| FKBP10    | 4.88E-53 | -0.30067 | 0.091 | 0.165 | 9.76E-50 |
| IGKV1-16  | 2.90E-52 | -1.3001  | 0.081 | 0.13  | 5.79E-49 |
| ERRFI1    | 3.88E-52 | -0.25785 | 0.194 | 0.293 | 7.77E-49 |
| RND3      | 5.81E-52 | -0.4309  | 0.136 | 0.2   | 1.16E-48 |
| IGHV3-48  | 2.12E-51 | -1.78658 | 0.076 | 0.144 | 4.23E-48 |
| COL18A1   | 7.53E-51 | -0.72341 | 0.148 | 0.259 | 1.51E-47 |
| LAMB1     | 3.00E-50 | -0.40832 | 0.097 | 0.179 | 6.01E-47 |
| HIST2H2A. | 3.07E-49 | 0.316563 | 0.386 | 0.355 | 6.13E-46 |
| TRIM31    | 5.74E-49 | -0.27589 | 0.057 | 0.113 | 1.15E-45 |
| GGT5      | 9.56E-49 | -0.2657  | 0.102 | 0.102 | 1.91E-45 |
| TRBV7-2   | 2.60E-48 | -0.31076 | 0.074 | 0.13  | 5.19E-45 |
| MIR155HC  | 3.03E-48 | 0.783079 | 0.38  | 0.319 | 6.07E-45 |
| IGLV3-1   | 1.67E-47 | -2.24396 | 0.199 | 0.266 | 3.33E-44 |
| MYLK      | 1.70E-47 | -0.31867 | 0.036 | 0.124 | 3.41E-44 |
| ATP4B     | 2.99E-47 | -0.40583 | 0.063 | 0.125 | 5.99E-44 |
| C1R       | 1.07E-46 | -0.66022 | 0.1   | 0.186 | 2.14E-43 |
| IGKV2-30  | 7.43E-46 | -1.32918 | 0.119 | 0.193 | 1.49E-42 |
| MFGE8     | 7.96E-46 | -0.49539 | 0.125 | 0.202 | 1.59E-42 |
| POSTN     | 9.19E-46 | -1.83994 | 0.043 | 0.116 | 1.84E-42 |
| MCAM      | 1.95E-45 | -0.40966 | 0.076 | 0.151 | 3.90E-42 |
| SERPINB2  | 4.28E-45 | 1.216636 | 0.174 | 0.082 | 8.55E-42 |
| HSPA6     | 4.49E-45 | 0.417712 | 0.478 | 0.406 | 8.98E-42 |
| LDB2      | 1.46E-44 | -0.26837 | 0.085 | 0.14  | 2.92E-41 |

|           |          |          |       |       |          |
|-----------|----------|----------|-------|-------|----------|
| SPINK4    | 1.84E-44 | -0.98787 | 0.169 | 0.229 | 3.68E-41 |
| NCOA7     | 3.65E-43 | -0.3891  | 0.187 | 0.274 | 7.30E-40 |
| XCL1      | 4.80E-43 | -0.92732 | 0.173 | 0.23  | 9.59E-40 |
| RHPN2     | 5.93E-43 | -0.26417 | 0.124 | 0.176 | 1.19E-39 |
| HSPG2     | 6.68E-43 | -0.96772 | 0.172 | 0.252 | 1.34E-39 |
| HSD17B2   | 4.34E-42 | -0.28495 | 0.075 | 0.145 | 8.69E-39 |
| IGHV3-7   | 9.15E-42 | -2.51404 | 0.126 | 0.194 | 1.83E-38 |
| RNASE1    | 2.36E-41 | 1.324617 | 0.445 | 0.415 | 4.72E-38 |
| TIMP3     | 4.96E-41 | -0.86014 | 0.167 | 0.227 | 9.93E-38 |
| TNFRSF12L | 9.98E-41 | -0.33845 | 0.228 | 0.299 | 2.00E-37 |
| MUC2      | 1.09E-40 | -0.42632 | 0.203 | 0.137 | 2.18E-37 |
| MT2A      | 2.20E-39 | 0.55669  | 0.687 | 0.658 | 4.41E-36 |
| ANKRD36C  | 5.84E-39 | -0.76032 | 0.154 | 0.242 | 1.17E-35 |
| IGHM      | 7.84E-39 | -3.17095 | 0.185 | 0.265 | 1.57E-35 |
| CA2       | 8.90E-39 | -0.74284 | 0.337 | 0.411 | 1.78E-35 |
| EFEMP2    | 9.29E-39 | -0.33968 | 0.132 | 0.164 | 1.86E-35 |
| PLPP3     | 9.39E-39 | -0.64102 | 0.115 | 0.167 | 1.88E-35 |
| IGLV5-45  | 9.65E-39 | -2.65725 | 0.146 | 0.098 | 1.93E-35 |
| DEPP1     | 2.60E-38 | -0.47484 | 0.124 | 0.164 | 5.20E-35 |
| PTGDS     | 3.01E-38 | -0.50305 | 0.119 | 0.135 | 6.02E-35 |
| TMPRSS2   | 8.45E-38 | -0.31111 | 0.057 | 0.151 | 1.69E-34 |
| COL1A1    | 1.45E-37 | -2.28332 | 0.163 | 0.252 | 2.91E-34 |
| IGLV2-8   | 1.98E-37 | -2.47317 | 0.183 | 0.244 | 3.96E-34 |
| IGLV3-25  | 5.16E-37 | -2.48759 | 0.205 | 0.267 | 1.03E-33 |
| CCL2      | 1.29E-36 | 1.040962 | 0.274 | 0.195 | 2.59E-33 |
| IGHV4-39  | 7.05E-36 | -2.43353 | 0.161 | 0.225 | 1.41E-32 |
| VSIG1     | 9.19E-36 | -0.39658 | 0.14  | 0.222 | 1.84E-32 |
| IGHV1-46  | 2.06E-35 | -2.04089 | 0.171 | 0.228 | 4.13E-32 |
| RAMP3     | 4.81E-35 | -0.53763 | 0.071 | 0.118 | 9.62E-32 |
| COL4A2    | 6.74E-35 | -0.93188 | 0.177 | 0.226 | 1.35E-31 |
| CRTAM     | 3.30E-34 | -0.27002 | 0.172 | 0.129 | 6.60E-31 |
| ATP4A     | 2.53E-33 | -0.42099 | 0.084 | 0.133 | 5.06E-30 |
| IGKV1-5   | 4.84E-33 | -3.13908 | 0.251 | 0.31  | 9.68E-30 |
| MT1M      | 1.19E-32 | -0.45733 | 0.184 | 0.224 | 2.39E-29 |
| COL15A1   | 8.53E-32 | -0.5663  | 0.122 | 0.146 | 1.71E-28 |
| EMP2      | 4.15E-30 | -0.39473 | 0.205 | 0.232 | 8.30E-27 |
| IGKV2D-2C | 5.76E-30 | -1.09215 | 0.069 | 0.13  | 1.15E-26 |
| TCIM      | 6.18E-30 | -0.6055  | 0.156 | 0.214 | 1.24E-26 |
| IGHG2     | 3.02E-29 | -1.38943 | 0.125 | 0.095 | 6.05E-26 |
| ACTA2     | 5.42E-29 | -1.18735 | 0.181 | 0.248 | 1.08E-25 |
| TRBV20-1  | 6.48E-29 | -0.36451 | 0.146 | 0.19  | 1.30E-25 |
| SERPINE2  | 3.66E-28 | -0.38179 | 0.075 | 0.146 | 7.33E-25 |
| ARHGAP2C  | 1.12E-27 | -0.34866 | 0.074 | 0.135 | 2.25E-24 |
| AQP1      | 1.31E-27 | -0.55886 | 0.132 | 0.146 | 2.62E-24 |
| HIF1A-AS2 | 3.07E-27 | 0.415394 | 0.234 | 0.186 | 6.15E-24 |
| IGKV3-20  | 3.99E-26 | -3.53527 | 0.281 | 0.339 | 7.97E-23 |
| EGR2      | 4.42E-26 | 0.427278 | 0.26  | 0.2   | 8.84E-23 |
| MFAP4     | 7.93E-26 | -0.99065 | 0.098 | 0.131 | 1.59E-22 |
| IGLV3-21  | 7.96E-26 | -2.48837 | 0.18  | 0.225 | 1.59E-22 |
| KRT20     | 8.41E-26 | -0.40699 | 0.189 | 0.231 | 1.68E-22 |
| IGHV3-21  | 7.81E-25 | -2.06369 | 0.097 | 0.151 | 1.56E-21 |
| SFRP2     | 1.20E-24 | -0.50578 | 0.108 | 0.076 | 2.41E-21 |
| IGKV4-1   | 5.05E-24 | -3.64035 | 0.24  | 0.302 | 1.01E-20 |
| LAMB3     | 1.89E-23 | -0.39524 | 0.168 | 0.208 | 3.79E-20 |
| SPARC     | 2.10E-23 | -1.99291 | 0.261 | 0.329 | 4.20E-20 |
| CLEC14A   | 9.51E-23 | -0.32621 | 0.1   | 0.072 | 1.90E-19 |
| IGKV1D-3C | 1.72E-22 | -1.59869 | 0.079 | 0.116 | 3.43E-19 |
| IGLV1-47  | 2.78E-22 | -1.66826 | 0.202 | 0.239 | 5.57E-19 |

|          |          |          |       |       |           |
|----------|----------|----------|-------|-------|-----------|
| CD34     | 1.25E-21 | -0.38653 | 0.088 | 0.132 | 2.49E-18  |
| PXDN     | 1.92E-21 | -0.26748 | 0.066 | 0.118 | 3.85E-18  |
| MALL     | 2.13E-21 | -0.26719 | 0.134 | 0.16  | 4.27E-18  |
| ATP1B1   | 2.37E-21 | -0.36913 | 0.326 | 0.374 | 4.74E-18  |
| WWTR1    | 6.53E-21 | -0.29725 | 0.064 | 0.151 | 1.31E-17  |
| IGLV2-14 | 3.06E-20 | -2.75641 | 0.25  | 0.299 | 6.12E-17  |
| FBLN1    | 3.79E-20 | -0.73674 | 0.105 | 0.154 | 7.58E-17  |
| IGHV4-61 | 5.17E-20 | -1.51088 | 0.075 | 0.107 | 1.03E-16  |
| RAMP2    | 8.70E-20 | -0.85873 | 0.146 | 0.195 | 1.74E-16  |
| IGHV3-11 | 9.23E-20 | -1.32928 | 0.069 | 0.104 | 1.85E-16  |
| CXCL12   | 1.36E-19 | -0.50822 | 0.145 | 0.145 | 2.71E-16  |
| IGHV1-3  | 1.48E-19 | -1.82571 | 0.124 | 0.179 | 2.96E-16  |
| NUPR1    | 2.08E-19 | 0.783435 | 0.291 | 0.228 | 4.17E-16  |
| IGLV4-69 | 3.43E-19 | -1.67256 | 0.106 | 0.145 | 6.86E-16  |
| PKIB     | 5.76E-19 | 0.304635 | 0.223 | 0.123 | 1.15E-15  |
| IGHV5-51 | 7.79E-19 | -2.70871 | 0.182 | 0.217 | 1.56E-15  |
| COL6A3   | 1.03E-18 | -0.58002 | 0.061 | 0.115 | 2.05E-15  |
| GNLY     | 1.13E-18 | -1.56757 | 0.101 | 0.168 | 2.27E-15  |
| GAST     | 1.77E-18 | -2.31132 | 0.188 | 0.228 | 3.55E-15  |
| SLC9A3R2 | 4.46E-18 | -0.72312 | 0.176 | 0.226 | 8.93E-15  |
| NDUFA4L2 | 5.22E-18 | -0.59008 | 0.128 | 0.179 | 1.04E-14  |
| IGKV1-17 | 1.32E-16 | -2.43548 | 0.183 | 0.207 | 2.64E-13  |
| IGHV1-18 | 1.78E-16 | -2.2238  | 0.147 | 0.186 | 3.55E-13  |
| MUC3A    | 3.24E-16 | -0.31083 | 0.173 | 0.205 | 6.48E-13  |
| BPIFB1   | 5.59E-16 | -0.41496 | 0.095 | 0.125 | 1.12E-12  |
| GEM      | 2.01E-15 | 0.253375 | 0.317 | 0.28  | 4.01E-12  |
| CCDC80   | 2.01E-15 | -0.9532  | 0.163 | 0.197 | 4.02E-12  |
| FCGBP    | 2.52E-15 | -0.34132 | 0.214 | 0.251 | 5.03E-12  |
| IGHV4-34 | 3.22E-15 | -2.57825 | 0.135 | 0.178 | 6.45E-12  |
| IGLV2-23 | 4.10E-15 | -2.43242 | 0.239 | 0.273 | 8.20E-12  |
| HTRA1    | 6.37E-15 | -0.26836 | 0.16  | 0.176 | 1.27E-11  |
| LUM      | 1.19E-13 | -1.43575 | 0.087 | 0.148 | 2.37E-10  |
| PRAP1    | 1.23E-13 | -0.32495 | 0.136 | 0.156 | 2.46E-10  |
| CXCL14   | 1.56E-13 | -2.16862 | 0.17  | 0.196 | 3.11E-10  |
| EGFL7    | 2.04E-13 | -0.56457 | 0.222 | 0.18  | 4.07E-10  |
| HYAL2    | 2.84E-13 | -0.33533 | 0.174 | 0.192 | 5.69E-10  |
| IGHV1-2  | 5.86E-13 | -1.46623 | 0.129 | 0.113 | 1.17E-09  |
| IGLV2-11 | 1.12E-12 | -2.09281 | 0.219 | 0.26  | 2.23E-09  |
| IGLV3-19 | 1.31E-12 | -2.47967 | 0.198 | 0.229 | 2.62E-09  |
| BCAS1    | 2.43E-12 | -0.37861 | 0.179 | 0.242 | 4.85E-09  |
| CCL11    | 2.81E-12 | -0.94005 | 0.1   | 0.067 | 5.63E-09  |
| IGKV2-28 | 7.04E-12 | -1.43116 | 0.083 | 0.11  | 1.41E-08  |
| IGHV3-33 | 9.99E-12 | -1.09417 | 0.106 | 0.129 | 2.00E-08  |
| IGLV1-51 | 1.36E-11 | -2.52398 | 0.206 | 0.236 | 2.73E-08  |
| FHL1     | 1.43E-11 | -0.40602 | 0.174 | 0.226 | 2.85E-08  |
| CTLA4    | 1.91E-11 | -0.39917 | 0.113 | 0.108 | 3.83E-08  |
| TFF3     | 2.93E-11 | -1.30046 | 0.174 | 0.22  | 5.86E-08  |
| FBN1     | 1.21E-10 | -0.36093 | 0.064 | 0.103 | 2.43E-07  |
| IGKV1-12 | 1.46E-10 | -2.04055 | 0.112 | 0.137 | 2.93E-07  |
| PCOLCE   | 4.02E-10 | -0.52204 | 0.167 | 0.194 | 8.05E-07  |
| LHFPL6   | 4.40E-10 | -0.40344 | 0.161 | 0.11  | 8.79E-07  |
| CES2     | 5.41E-10 | -0.28894 | 0.216 | 0.261 | 1.08E-06  |
| TFPI     | 6.43E-10 | -0.29999 | 0.204 | 0.193 | 1.29E-06  |
| APOA1    | 2.26E-09 | -0.3795  | 0.154 | 0.132 | 4.52E-06  |
| COL5A2   | 2.30E-09 | -0.50766 | 0.06  | 0.14  | 4.60E-06  |
| BCAM     | 4.09E-09 | -0.43806 | 0.168 | 0.185 | 8.17E-06  |
| PLAT     | 4.46E-09 | -0.84407 | 0.061 | 0.124 | 8.93E-06  |
| HEG1     | 5.28E-08 | -0.2641  | 0.114 | 0.129 | 0.0001055 |

|           |           |          |       |       |           |
|-----------|-----------|----------|-------|-------|-----------|
| BGN       | 3.32E-07  | -1.0456  | 0.157 | 0.184 | 0.0006645 |
| IGLV7-46  | 8.43E-07  | -2.24041 | 0.178 | 0.158 | 0.0016855 |
| IGLV1-36  | 1.86E-06  | -0.82521 | 0.08  | 0.101 | 0.0037261 |
| EMILIN1   | 2.10E-06  | -0.33247 | 0.135 | 0.124 | 0.0042019 |
| REG3A     | 3.05E-06  | -0.8175  | 0.172 | 0.192 | 0.0061045 |
| EFNB2     | 4.21E-06  | -0.36387 | 0.147 | 0.205 | 0.0084157 |
| MMP2      | 7.68E-06  | -0.69268 | 0.148 | 0.161 | 0.0153552 |
| IGKV2D-21 | 8.07E-06  | -1.94707 | 0.147 | 0.126 | 0.0161326 |
| IDO1      | 1.83E-05  | 0.564135 | 0.105 | 0.046 | 0.0366556 |
| TRBV28    | 2.18E-05  | -0.32815 | 0.052 | 0.119 | 0.0435836 |
| IGKV1-9   | 4.15E-05  | -1.80604 | 0.199 | 0.206 | 0.0829069 |
| LOXL2     | 0.0001616 | -0.32942 | 0.107 | 0.143 | 0.3231074 |
| BNIP3     | 0.0001862 | 0.32228  | 0.332 | 0.335 | 0.3724736 |
| SLPI      | 0.0003408 | -1.12855 | 0.241 | 0.286 | 0.6815558 |
| SLC7A11   | 0.0009836 | 0.421071 | 0.163 | 0.126 | 1         |
| IGHV3-20  | 0.0012195 | -0.25698 | 0.09  | 0.109 | 1         |
| GHRL      | 0.0014526 | -2.45969 | 0.114 | 0.075 | 1         |
| APOL1     | 0.0018895 | -0.37188 | 0.114 | 0.159 | 1         |
| TPSAB1    | 0.0020435 | -1.38888 | 0.106 | 0.104 | 1         |
| DUOXA2    | 0.0024184 | -0.30993 | 0.075 | 0.105 | 1         |
| PLVAP     | 0.0030291 | -1.61696 | 0.183 | 0.175 | 1         |
| RBP2      | 0.0052572 | -0.33495 | 0.098 | 0.12  | 1         |
| IGHV7-4-1 | 0.0054671 | -1.70241 | 0.113 | 0.13  | 1         |
| IGHV4-59  | 0.0091473 | -1.85849 | 0.138 | 0.15  | 1         |
| CXCL10    | 0.0193162 | 1.569762 | 0.162 | 0.126 | 1         |
| MMP1      | 0.0250505 | 0.645817 | 0.159 | 0.106 | 1         |
| AEBP1     | 0.032484  | -0.45335 | 0.065 | 0.129 | 1         |
| CFB       | 0.0382761 | -0.30321 | 0.194 | 0.211 | 1         |
| IGHG3     | 0.0834003 | -1.91115 | 0.072 | 0.109 | 1         |
| IGHV3-74  | 0.0843401 | -1.34074 | 0.164 | 0.148 | 1         |
| IGLV6-57  | 0.087204  | -2.35818 | 0.176 | 0.183 | 1         |
| SLC39A8   | 0.1222274 | 0.374719 | 0.286 | 0.287 | 1         |
| COX7A1    | 0.1376985 | -0.31432 | 0.118 | 0.116 | 1         |
| IGHV3-30  | 0.1648455 | -2.15688 | 0.129 | 0.124 | 1         |
| CCL7      | 0.1692355 | 0.268333 | 0.103 | 0.034 | 1         |
| PI3       | 0.2432074 | -0.49806 | 0.09  | 0.113 | 1         |
| TNFSF15   | 0.4541186 | 0.375168 | 0.142 | 0.096 | 1         |
| TNFRSF4   | 0.4847671 | -0.38566 | 0.234 | 0.241 | 1         |
| APOA4     | 0.5756185 | -0.32305 | 0.123 | 0.131 | 1         |
| IGKV1-39  | 0.5866968 | -2.52692 | 0.218 | 0.218 | 1         |
| TAGLN     | 0.5946881 | -1.34577 | 0.213 | 0.24  | 1         |
| IGHG4     | 0.708795  | -1.65234 | 0.114 | 0.131 | 1         |
| IGKV1-27  | 0.8743168 | -2.06461 | 0.188 | 0.189 | 1         |
| FBLN5     | 0.9850894 | -0.26481 | 0.128 | 0.171 | 1         |
| ANPEP     | 0.9976293 | 0.381631 | 0.28  | 0.262 | 1         |

Table S2 Differential expression genes (DEGs) of cluster 2 and 5 in M2 macrophage subpopulation

| gene     | p_val     | avg_log2F | pct.1 | pct.2 | p_val_adj | cluster |
|----------|-----------|-----------|-------|-------|-----------|---------|
| GZMB     | 5.08E-63  | 5.233832  | 1     | 0.142 | 1.02E-59  | 8       |
| CCL22    | 3.68E-170 | 5.040539  | 0.863 | 0.094 | 7.36E-167 | 6       |
| FN1      | 0         | 4.012416  | 0.91  | 0.185 | 0         | 3       |
| CCL19    | 2.84E-107 | 3.979962  | 0.725 | 0.114 | 5.69E-104 | 6       |
| FSCN1    | 5.62E-116 | 3.870675  | 0.963 | 0.359 | 1.12E-112 | 6       |
| MARCO    | 0         | 3.753019  | 0.897 | 0.198 | 0         | 3       |
| SPP1     | 0         | 3.656597  | 0.913 | 0.315 | 0         | 3       |
| CCR7     | 3.73E-113 | 3.555058  | 0.875 | 0.218 | 7.45E-110 | 6       |
| LAMP3    | 3.77E-152 | 3.438871  | 0.969 | 0.203 | 7.54E-149 | 6       |
| CCL17    | 2.41E-87  | 3.428348  | 0.556 | 0.084 | 4.83E-84  | 6       |
| HIST1H4C | 9.14E-41  | 3.360642  | 0.947 | 0.372 | 1.83E-37  | 7       |
| S100A8   | 0         | 3.261885  | 0.871 | 0.351 | 0         | 1       |
| PLD4     | 2.19E-44  | 3.207492  | 0.945 | 0.299 | 4.38E-41  | 8       |
| EBI3     | 7.06E-91  | 3.173182  | 0.875 | 0.319 | 1.41E-87  | 6       |
| CCL18    | 9.88E-306 | 3.056614  | 0.534 | 0.128 | 1.98E-302 | 0       |
| IDO1     | 1.93E-66  | 2.930133  | 0.688 | 0.091 | 3.86E-63  | 6       |
| S100A9   | 0         | 2.869014  | 0.891 | 0.522 | 0         | 1       |
| HAMP     | 1.12E-300 | 2.828479  | 0.808 | 0.308 | 2.25E-297 | 3       |
| LILRA4   | 3.68E-64  | 2.818742  | 0.909 | 0.103 | 7.36E-61  | 8       |
| TIMP1    | 0         | 2.810918  | 0.97  | 0.798 | 0         | 1       |
| MKI67    | 5.22E-77  | 2.712964  | 0.934 | 0.066 | 1.04E-73  | 7       |
| CXCL5    | 3.09E-92  | 2.694401  | 0.317 | 0.119 | 6.18E-89  | 1       |
| C12orf75 | 3.96E-45  | 2.691591  | 0.891 | 0.154 | 7.92E-42  | 8       |
| IL1RN    | 2.53E-190 | 2.686343  | 0.65  | 0.321 | 5.07E-187 | 1       |
| UBD      | 7.15E-77  | 2.678301  | 0.7   | 0.178 | 1.43E-73  | 6       |
| GPR183   | 1.80E-28  | 2.670364  | 0.964 | 0.603 | 3.59E-25  | 8       |
| SERPINB2 | 7.01E-289 | 2.639373  | 0.464 | 0.079 | 1.40E-285 | 1       |
| FCN1     | 0         | 2.630154  | 0.751 | 0.203 | 0         | 1       |
| SPIB     | 9.84E-58  | 2.628692  | 0.909 | 0.084 | 1.97E-54  | 8       |
| CLIC3    | 1.81E-51  | 2.527605  | 0.873 | 0.145 | 3.62E-48  | 8       |
| MIR155HG | 1.66E-45  | 2.485446  | 0.762 | 0.371 | 3.32E-42  | 6       |
| TCF4     | 7.98E-44  | 2.453633  | 1     | 0.295 | 1.60E-40  | 8       |
| NUPR1    | 2.15E-224 | 2.452425  | 0.713 | 0.234 | 4.31E-221 | 3       |
| PLTP     | 1.34E-299 | 2.442386  | 0.928 | 0.459 | 2.69E-296 | 3       |
| S100A12  | 0         | 2.438412  | 0.568 | 0.086 | 0         | 1       |
| SELENOP  | 0         | 2.405241  | 0.828 | 0.347 | 0         | 0       |
| EGLN3    | 1.95E-44  | 2.367136  | 0.927 | 0.169 | 3.91E-41  | 8       |
| FCGR2B   | 5.48E-296 | 2.348972  | 0.922 | 0.451 | 1.10E-292 | 3       |
| TOP2A    | 6.93E-80  | 2.342833  | 0.934 | 0.074 | 1.39E-76  | 7       |
| CENPF    | 1.63E-73  | 2.338233  | 0.921 | 0.079 | 3.25E-70  | 7       |
| PLAC8    | 1.84E-37  | 2.321222  | 0.927 | 0.27  | 3.69E-34  | 8       |
| TYMS     | 2.02E-65  | 2.305735  | 0.868 | 0.136 | 4.04E-62  | 7       |
| ACP5     | 0         | 2.275825  | 0.885 | 0.418 | 0         | 0       |
| UBE2C    | 1.64E-68  | 2.258213  | 0.855 | 0.141 | 3.29E-65  | 7       |
| DERL3    | 2.74E-63  | 2.255807  | 0.909 | 0.149 | 5.47E-60  | 8       |
| MMP12    | 2.07E-120 | 2.255276  | 0.462 | 0.14  | 4.14E-117 | 0       |
| EREG     | 0         | 2.2285    | 0.758 | 0.272 | 0         | 1       |
| TPM2     | 2.06E-43  | 2.201701  | 0.873 | 0.151 | 4.12E-40  | 8       |
| JCHAIN   | 3.84E-47  | 2.198009  | 0.982 | 0.289 | 7.67E-44  | 8       |
| TCL1A    | 4.31E-58  | 2.185586  | 0.618 | 0.047 | 8.61E-55  | 8       |
| SERPINF1 | 8.60E-35  | 2.183544  | 0.909 | 0.293 | 1.72E-31  | 8       |
| SLC40A1  | 0         | 2.127864  | 0.795 | 0.205 | 0         | 0       |
| CD1C     | 1.65E-107 | 2.090473  | 0.557 | 0.241 | 3.31E-104 | 4       |
| C3       | 5.46E-212 | 2.071988  | 0.818 | 0.245 | 1.09E-208 | 5       |
| CYP27A1  | 0         | 2.065292  | 0.832 | 0.292 | 0         | 3       |
| AREG     | 1.71E-17  | 2.06382   | 0.927 | 0.526 | 3.42E-14  | 8       |

|          |           |          |       |       |           |   |
|----------|-----------|----------|-------|-------|-----------|---|
| PTTG1    | 1.20E-49  | 2.036867 | 0.908 | 0.301 | 2.39E-46  | 7 |
| VCAN     | 0         | 2.024427 | 0.73  | 0.264 | 0         | 1 |
| IGHV2-5  | 0.0002239 | 1.988499 | 0.046 | 0.107 | 0.4478326 | 3 |
| PTGS2    | 1.45E-85  | 1.96891  | 0.546 | 0.348 | 2.90E-82  | 1 |
| RASD1    | 4.05E-30  | 1.96027  | 0.836 | 0.275 | 8.10E-27  | 8 |
| CDK1     | 9.35E-63  | 1.960004 | 0.882 | 0.14  | 1.87E-59  | 7 |
| FCER1A   | 1.10E-131 | 1.954343 | 0.514 | 0.165 | 2.21E-128 | 4 |
| PLIN2    | 9.31E-183 | 1.940914 | 0.921 | 0.657 | 1.86E-179 | 3 |
| IL1B     | 1.56E-191 | 1.917998 | 0.867 | 0.624 | 3.13E-188 | 1 |
| NUSAP1   | 3.22E-60  | 1.905707 | 0.882 | 0.1   | 6.45E-57  | 7 |
| LAMP5    | 3.67E-42  | 1.899542 | 0.782 | 0.167 | 7.33E-39  | 8 |
| KRT5     | 1.20E-26  | 1.892095 | 0.418 | 0.004 | 2.40E-23  | 8 |
| MZB1     | 6.67E-54  | 1.891301 | 0.855 | 0.108 | 1.33E-50  | 8 |
| CFD      | 3.25E-193 | 1.891011 | 0.905 | 0.589 | 6.50E-190 | 3 |
| IGLV2-14 | 6.96E-05  | 1.866252 | 0.166 | 0.258 | 0.1392408 | 4 |
| THBS1    | 3.73E-145 | 1.839349 | 0.652 | 0.402 | 7.46E-142 | 1 |
| IGLV2-14 | 3.98E-05  | 1.837327 | 0.19  | 0.258 | 0.0795213 | 2 |
| RNASE1   | 4.25E-168 | 1.833962 | 0.667 | 0.348 | 8.49E-165 | 0 |
| C15orf48 | 2.65E-127 | 1.817644 | 0.756 | 0.582 | 5.30E-124 | 1 |
| CD300E   | 0         | 1.805813 | 0.628 | 0.117 | 0         | 1 |
| CCL20    | 1.08E-108 | 1.805637 | 0.618 | 0.363 | 2.16E-105 | 1 |
| HBB      | 5.31E-05  | 1.805516 | 0.199 | 0.27  | 0.106203  | 2 |
| SCT      | 2.20E-150 | 1.777174 | 0.782 | 0.037 | 4.40E-147 | 8 |
| HIST2H2A | 3.27E-14  | 1.76842  | 0.709 | 0.383 | 6.54E-11  | 8 |
| CTSD     | 0         | 1.76097  | 0.89  | 0.505 | 0         | 0 |
| APOBEC3/ | 2.36E-177 | 1.739681 | 0.413 | 0.072 | 4.72E-174 | 1 |
| IGLV2-23 | 0.0011379 | 1.726723 | 0.194 | 0.246 | 1         | 2 |
| IGHM     | 0.0006593 | 1.705676 | 0.11  | 0.193 | 1         | 4 |
| CKS1B    | 9.57E-54  | 1.699046 | 0.868 | 0.181 | 1.91E-50  | 7 |
| PLAUR    | 1.35E-271 | 1.69541  | 0.946 | 0.76  | 2.70E-268 | 1 |
| LYVE1    | 2.08E-173 | 1.688934 | 0.591 | 0.217 | 4.16E-170 | 3 |
| RAMP1    | 1.54E-47  | 1.684009 | 0.606 | 0.223 | 3.09E-44  | 6 |
| HMMR     | 1.25E-98  | 1.665471 | 0.789 | 0.064 | 2.50E-95  | 7 |
| IGKV1-39 | 4.04E-18  | 1.658653 | 0.108 | 0.233 | 8.07E-15  | 2 |
| STAB1    | 0         | 1.657469 | 0.846 | 0.364 | 0         | 0 |
| TNFAIP6  | 2.05E-54  | 1.642732 | 0.435 | 0.21  | 4.11E-51  | 1 |
| SLC2A5   | 8.89E-262 | 1.642477 | 0.681 | 0.194 | 1.78E-258 | 3 |
| CXCL3    | 2.02E-146 | 1.633632 | 0.841 | 0.543 | 4.04E-143 | 3 |
| AQP9     | 1.05E-234 | 1.631597 | 0.601 | 0.183 | 2.10E-231 | 1 |
| BNIP3    | 3.86E-169 | 1.61943  | 0.654 | 0.289 | 7.71E-166 | 3 |
| TPX2     | 1.96E-62  | 1.612019 | 0.737 | 0.058 | 3.92E-59  | 7 |
| RNASET2  | 1.18E-227 | 1.601289 | 0.952 | 0.76  | 2.36E-224 | 3 |
| S100B    | 7.13E-21  | 1.597552 | 0.346 | 0.237 | 1.43E-17  | 4 |
| CD1E     | 4.37E-90  | 1.596504 | 0.498 | 0.219 | 8.75E-87  | 4 |
| NCCRP1   | 1.81E-177 | 1.580741 | 0.488 | 0.014 | 3.62E-174 | 6 |
| CCL3L1   | 6.31E-38  | 1.576678 | 0.626 | 0.493 | 1.26E-34  | 1 |
| CCL20    | 5.13E-50  | 1.57169  | 0.569 | 0.407 | 1.03E-46  | 3 |
| CXCL8    | 1.38E-88  | 1.561419 | 0.836 | 0.672 | 2.76E-85  | 1 |
| IGHV4-39 | 0.0015693 | 1.555907 | 0.174 | 0.159 | 1         | 2 |
| MMP9     | 6.39E-191 | 1.553258 | 0.628 | 0.242 | 1.28E-187 | 0 |
| GSTP1    | 2.82E-46  | 1.551949 | 0.988 | 0.849 | 5.65E-43  | 6 |
| FCGBP    | 5.94E-26  | 1.542492 | 0.349 | 0.203 | 1.19E-22  | 5 |
| LGMN     | 1.05E-292 | 1.541937 | 0.872 | 0.521 | 2.11E-289 | 0 |
| CXCL9    | 6.49E-44  | 1.54018  | 0.306 | 0.086 | 1.30E-40  | 0 |
| ASPM     | 1.07E-100 | 1.527007 | 0.829 | 0.042 | 2.14E-97  | 7 |
| FUCA1    | 3.12E-256 | 1.520091 | 0.66  | 0.278 | 6.24E-253 | 0 |
| IGLC2    | 7.59E-16  | 1.512242 | 0.184 | 0.146 | 1.52E-12  | 0 |
| IL1A     | 2.55E-53  | 1.50678  | 0.435 | 0.25  | 5.10E-50  | 1 |

|          |           |          |       |       |           |   |
|----------|-----------|----------|-------|-------|-----------|---|
| TNIP3    | 2.32E-27  | 1.497918 | 0.311 | 0.153 | 4.64E-24  | 1 |
| PLA2G7   | 0         | 1.491581 | 0.716 | 0.235 | 0         | 0 |
| JCHAIN   | 4.14E-13  | 1.483529 | 0.185 | 0.31  | 8.28E-10  | 2 |
| GZMA     | 4.82E-31  | 1.47747  | 0.302 | 0.14  | 9.63E-28  | 2 |
| TK1      | 5.51E-52  | 1.475571 | 0.803 | 0.171 | 1.10E-48  | 7 |
| AOC1     | 2.17E-60  | 1.474452 | 0.544 | 0.114 | 4.34E-57  | 6 |
| LIPA     | 4.65E-308 | 1.464984 | 0.854 | 0.48  | 9.30E-305 | 0 |
| RASSF4   | 1.05E-37  | 1.461217 | 0.844 | 0.51  | 2.09E-34  | 6 |
| IGLC3    | 5.14E-63  | 1.457401 | 0.112 | 0.136 | 1.03E-59  | 0 |
| CXCL2    | 9.81E-118 | 1.456529 | 0.859 | 0.644 | 1.96E-114 | 3 |
| PCLAF    | 2.52E-43  | 1.448673 | 0.711 | 0.126 | 5.05E-40  | 7 |
| HMOX1    | 1.83E-109 | 1.442267 | 0.839 | 0.595 | 3.67E-106 | 3 |
| PGA3     | 1.00E-86  | 1.437373 | 0.437 | 0.199 | 2.01E-83  | 0 |
| IGLV3-1  | 1.86E-41  | 1.436191 | 0.026 | 0.223 | 3.72E-38  | 3 |
| BCL2A1   | 1.35E-253 | 1.433216 | 0.924 | 0.678 | 2.70E-250 | 1 |
| CCL17    | 4.00E-20  | 1.427498 | 0.186 | 0.086 | 7.99E-17  | 4 |
| GTSE1    | 5.67E-115 | 1.425044 | 0.868 | 0.043 | 1.13E-111 | 7 |
| FCGR1A   | 2.54E-130 | 1.423041 | 0.84  | 0.395 | 5.08E-127 | 5 |
| APOC1    | 5.20E-168 | 1.419251 | 0.911 | 0.506 | 1.04E-164 | 3 |
| PKIB     | 3.59E-119 | 1.410866 | 0.547 | 0.191 | 7.19E-116 | 4 |
| FCGR3A   | 6.28E-127 | 1.402449 | 0.943 | 0.51  | 1.26E-123 | 5 |
| CLEC10A  | 1.11E-49  | 1.38876  | 0.607 | 0.43  | 2.23E-46  | 4 |
| CDKN3    | 1.84E-58  | 1.385377 | 0.776 | 0.162 | 3.69E-55  | 7 |
| PPP1R14A | 1.56E-37  | 1.383882 | 0.818 | 0.212 | 3.12E-34  | 8 |
| IGKV3-20 | 1.53E-51  | 1.382932 | 0.054 | 0.312 | 3.06E-48  | 3 |
| HLA-DQB1 | 4.11E-153 | 1.381536 | 0.973 | 0.787 | 8.23E-150 | 4 |
| CCNB1    | 7.98E-26  | 1.381161 | 0.645 | 0.169 | 1.60E-22  | 7 |
| C1QB     | 0         | 1.379904 | 0.964 | 0.592 | 0         | 0 |
| CLEC4C   | 2.03E-79  | 1.377653 | 0.564 | 0.018 | 4.06E-76  | 8 |
| SPON2    | 3.01E-34  | 1.37167  | 0.764 | 0.187 | 6.02E-31  | 8 |
| CDC20    | 1.83E-59  | 1.371012 | 0.75  | 0.133 | 3.67E-56  | 7 |
| CD14     | 8.36E-154 | 1.370831 | 0.942 | 0.682 | 1.67E-150 | 3 |
| HLA-DPB1 | 3.21E-174 | 1.358897 | 0.998 | 0.92  | 6.42E-171 | 4 |
| GZMK     | 3.83E-10  | 1.352633 | 0.196 | 0.11  | 7.66E-07  | 2 |
| BIRC5    | 5.75E-80  | 1.336242 | 0.842 | 0.086 | 1.15E-76  | 7 |
| RRM2     | 2.64E-58  | 1.330367 | 0.645 | 0.028 | 5.29E-55  | 7 |
| ADM      | 6.05E-127 | 1.329714 | 0.727 | 0.402 | 1.21E-123 | 3 |
| IL4I1    | 3.60E-115 | 1.328838 | 0.632 | 0.316 | 7.21E-112 | 3 |
| IGKV3-11 | 2.61E-140 | 1.320757 | 0.359 | 0.114 | 5.23E-137 | 0 |
| CD200    | 1.56E-126 | 1.318866 | 0.619 | 0.047 | 3.13E-123 | 6 |
| CCL24    | 3.61E-253 | 1.316413 | 0.517 | 0.16  | 7.22E-250 | 0 |
| PPP1R14A | 2.03E-22  | 1.305794 | 0.475 | 0.211 | 4.06E-19  | 6 |
| MRC1     | 1.41E-248 | 1.301402 | 0.716 | 0.297 | 2.82E-245 | 0 |
| C1QC     | 0         | 1.294578 | 0.965 | 0.588 | 0         | 0 |
| SPARC    | 6.23E-30  | 1.287499 | 0.377 | 0.245 | 1.25E-26  | 2 |
| GPR183   | 6.22E-18  | 1.282484 | 0.787 | 0.602 | 1.24E-14  | 6 |
| CALCRL   | 1.69E-35  | 1.267366 | 0.544 | 0.193 | 3.39E-32  | 6 |
| IGHA1    | 1.36E-35  | 1.255112 | 0.487 | 0.27  | 2.72E-32  | 0 |
| PLAC8    | 2.62E-75  | 1.251679 | 0.537 | 0.25  | 5.24E-72  | 4 |
| LGALS2   | 7.84E-80  | 1.250996 | 0.641 | 0.327 | 1.57E-76  | 4 |
| CTSZ     | 1.44E-302 | 1.228903 | 0.908 | 0.561 | 2.89E-299 | 0 |
| CKB      | 6.45E-21  | 1.223359 | 0.462 | 0.192 | 1.29E-17  | 6 |
| COL1A1   | 5.00E-45  | 1.215364 | 0.302 | 0.144 | 1.00E-41  | 2 |
| C1QA     | 0         | 1.210673 | 0.97  | 0.591 | 0         | 0 |
| DLGAP5   | 4.57E-59  | 1.204824 | 0.658 | 0.055 | 9.14E-56  | 7 |
| PPP1R14A | 2.65E-82  | 1.189328 | 0.461 | 0.193 | 5.30E-79  | 4 |
| HLA-DQA  | 3.84E-129 | 1.188652 | 0.985 | 0.809 | 7.68E-126 | 4 |
| CD70     | 1.75E-46  | 1.185786 | 0.5   | 0.12  | 3.51E-43  | 6 |

|          |           |          |       |       |           |   |
|----------|-----------|----------|-------|-------|-----------|---|
| CENPE    | 1.12E-33  | 1.165119 | 0.671 | 0.085 | 2.24E-30  | 7 |
| TMEM106  | 7.69E-37  | 1.159083 | 0.737 | 0.207 | 1.54E-33  | 7 |
| CD1E     | 1.28E-18  | 1.157688 | 0.475 | 0.238 | 2.56E-15  | 6 |
| CCNA2    | 2.79E-57  | 1.150026 | 0.711 | 0.02  | 5.59E-54  | 7 |
| AREG     | 2.02E-38  | 1.142013 | 0.705 | 0.512 | 4.04E-35  | 4 |
| COL1A2   | 6.83E-64  | 1.131563 | 0.301 | 0.124 | 1.37E-60  | 2 |
| HSPA6    | 1.29E-07  | 1.12045  | 0.522 | 0.474 | 0.0002585 | 4 |
| CCL4L2   | 5.57E-28  | 1.11615  | 0.721 | 0.58  | 1.11E-24  | 5 |
| TREM2    | 1.11E-84  | 1.087344 | 0.79  | 0.442 | 2.22E-81  | 5 |
| IGKV2-30 | 8.28E-11  | 1.082495 | 0.035 | 0.127 | 1.66E-07  | 4 |
| LTC4S    | 5.93E-124 | 1.063827 | 0.667 | 0.244 | 1.19E-120 | 5 |
| NRP2     | 2.48E-19  | 1.061363 | 0.619 | 0.326 | 4.96E-16  | 6 |
| COL3A1   | 1.29E-34  | 1.050528 | 0.274 | 0.145 | 2.58E-31  | 2 |
| FOLR2    | 7.06E-22  | 1.041749 | 0.584 | 0.459 | 1.41E-18  | 5 |
| TMEM176  | 6.06E-21  | 1.040388 | 0.85  | 0.642 | 1.21E-17  | 6 |
| FILIP1L  | 3.30E-28  | 1.040157 | 0.438 | 0.25  | 6.61E-25  | 5 |
| RASSF4   | 1.55E-92  | 1.039972 | 0.836 | 0.492 | 3.10E-89  | 5 |
| SPINT2   | 4.02E-69  | 1.000057 | 0.757 | 0.545 | 8.05E-66  | 4 |
| CD86     | 1.23E-12  | 0.9965   | 0.7   | 0.59  | 2.46E-09  | 6 |
| CCL3L1   | 5.71E-30  | 0.994061 | 0.665 | 0.514 | 1.14E-26  | 5 |
| HLA-DPA1 | 6.46E-110 | 0.989871 | 0.998 | 0.935 | 1.29E-106 | 4 |
| CSF1R    | 3.58E-83  | 0.976135 | 0.915 | 0.616 | 7.17E-80  | 5 |
| F13A1    | 0.0021496 | 0.975864 | 0.381 | 0.39  | 1         | 2 |
| HBB      | 2.54E-11  | 0.975697 | 0.153 | 0.272 | 5.07E-08  | 4 |
| CD207    | 8.73E-74  | 0.974801 | 0.261 | 0.064 | 1.75E-70  | 4 |
| MSR1     | 4.27E-97  | 0.960924 | 0.834 | 0.412 | 8.54E-94  | 5 |
| C3       | 1.12E-14  | 0.93818  | 0.338 | 0.28  | 2.25E-11  | 2 |
| PLD4     | 2.15E-57  | 0.935087 | 0.549 | 0.285 | 4.29E-54  | 5 |
| CD14     | 5.34E-40  | 0.920453 | 0.875 | 0.7   | 1.07E-36  | 5 |
| IDO1     | 7.58E-34  | 0.91809  | 0.263 | 0.09  | 1.52E-30  | 4 |
| GPR183   | 5.46E-32  | 0.915095 | 0.722 | 0.595 | 1.09E-28  | 4 |
| SLPI     | 0.0025853 | 0.884626 | 0.26  | 0.239 | 1         | 2 |
| F13A1    | 2.83E-74  | 0.87934  | 0.705 | 0.364 | 5.66E-71  | 5 |
| DNASE1L3 | 4.27E-20  | 0.873765 | 0.401 | 0.26  | 8.53E-17  | 4 |
| PLTP     | 2.64E-25  | 0.870473 | 0.663 | 0.503 | 5.29E-22  | 5 |
| VSIG4    | 1.84E-47  | 0.862665 | 0.735 | 0.494 | 3.68E-44  | 5 |
| CCL3     | 1.58E-38  | 0.854878 | 0.857 | 0.677 | 3.17E-35  | 5 |
| EGR2     | 3.96E-30  | 0.827713 | 0.442 | 0.246 | 7.92E-27  | 5 |
| GPR34    | 9.43E-68  | 0.804921 | 0.691 | 0.375 | 1.89E-64  | 5 |
| CCL4     | 2.45E-30  | 0.802882 | 0.842 | 0.707 | 4.91E-27  | 5 |
| HLA-DPA1 | 4.46E-76  | 0.798665 | 1     | 0.936 | 8.92E-73  | 5 |
| C1QA     | 3.54E-45  | 0.794847 | 0.921 | 0.69  | 7.08E-42  | 5 |
| MS4A6A   | 5.92E-60  | 0.791677 | 0.962 | 0.736 | 1.18E-56  | 5 |
| IFNG     | 1.41E-17  | 0.660254 | 0.161 | 0.09  | 2.82E-14  | 2 |
| HOPX     | 1.33E-20  | 0.638503 | 0.231 | 0.146 | 2.66E-17  | 2 |
| APOE     | 4.24E-22  | 0.618679 | 0.765 | 0.604 | 8.47E-19  | 2 |
| IGFBP7   | 0.0007477 | 0.613318 | 0.283 | 0.283 | 1         | 2 |
| MYL9     | 3.32E-15  | 0.591665 | 0.224 | 0.168 | 6.64E-12  | 2 |
| SPINK1   | 5.58E-18  | 0.589962 | 0.191 | 0.142 | 1.12E-14  | 2 |
| ACTA2    | 0.0012119 | 0.583275 | 0.188 | 0.18  | 1         | 2 |
| HIST1H4C | 3.05E-05  | 0.574733 | 0.378 | 0.379 | 0.0609724 | 2 |
| C1QA     | 5.77E-18  | 0.54061  | 0.848 | 0.688 | 1.15E-14  | 2 |
| CTSK     | 8.05E-11  | 0.537554 | 0.072 | 0.168 | 1.61E-07  | 2 |

**Table S3 Patients information and IHC scores for clinically validated specimens**

| <b>Clinical information of patients</b> |            |             |                 |
|-----------------------------------------|------------|-------------|-----------------|
| <b>Number</b>                           | <b>Sex</b> | <b>Days</b> | <b>PT or PM</b> |
| 1                                       | Female     | 155         | PM              |
| 2                                       | Male       | 86          | PM              |
| 3                                       | Male       | 551         | PM              |
| 4                                       | Male       | 103         | PM              |
| 5                                       | Female     | 531         | PM              |
| 6                                       | Male       | 312         | PM              |
| 7                                       | Female     | 287         | PM              |
| 8                                       | Female     | 287         | PM              |
| 9                                       | Male       | 307         | PM              |
| 10                                      | Male       | 1045        | PM              |
| 11                                      | Female     | 156         | PM              |
| 12                                      | Female     | 1791        | PM              |
| 13                                      | Male       | 665         | PM              |
| 14                                      | Male       | 512         | PM              |
| 15                                      | Female     | 206         | PM              |
| 16                                      | Male       | 1641        | PM              |
| 17                                      | Male       | 296         | PM              |
| 18                                      | Male       | 781         | PM              |
| 19                                      | Female     | 523         | PM              |
| 20                                      | Male       | 158         | PM              |
| 21                                      | Male       | 440         | PM              |
| 22                                      | Male       | 450         | PM              |
| 23                                      | Male       | 280         | PM              |
| 24                                      | Female     | 473         | PM              |
| 25                                      | Male       | 581         | PM              |
| 26                                      | Female     | 799         | PM              |
| 27                                      | Male       | 388         | PM              |
| 28                                      | Male       | 81          | PM              |
| 29                                      | Female     | 828         | PM              |
| 30                                      | Female     | 201         | PM              |
| 31                                      | Female     | 453         | PT              |
| 32                                      | Female     | 854         | PT              |
| 33                                      | Male       | 1147        | PT              |

|    |        |      |    |
|----|--------|------|----|
| 34 | Male   | 1473 | PT |
| 35 | Female | 1143 | PT |
| 36 | Female | 120  | PT |
| 37 | Male   | 1112 | PT |
| 38 | Male   | 2150 | PT |
| 39 | Male   | 1802 | PT |
| 40 | Female | 471  | PT |
| 41 | Male   | 528  | PT |
| 42 | Female | 412  | PT |
| 43 | Male   | 1045 | PT |
| 44 | Male   | 665  | PT |
| 45 | Male   | 2343 | PT |

**IHC\_score**

| <b>Number</b> | <b>CD163</b> | <b>DAB2</b> | <b>SPARC</b> | <b>PLTP</b> | <b>FOLR2</b> |
|---------------|--------------|-------------|--------------|-------------|--------------|
| 1             | 1.6842105    | 23.93939394 | 10.24077054  | 1.321585903 | 4.122137405  |
| 2             | 57.25689405  | 160.7995227 | 202.5795052  | 3.558718861 | 0.106157113  |
| 3             | 21.8666667   | 26.69117647 | 91.2790698   | 40.04901961 | 5.194805195  |
| 4             | 63.39370828  | 71.69201521 | 40.90566032  | 1.145038168 | 0.080256822  |
| 5             | 0.563204     | 36.22002821 | 1.11111111   | 2.141157811 | 8.555938886  |
| 6             | 176.5089722  | 199.3031359 | 78.99237935  | 35.19725557 | 0.660792952  |
| 7             | 8.4317032    | 6.557377049 | 5.0505051    | 6.576402321 | 0.260416667  |
| 8             | 5.3268765    | 11.38211382 | 141.6091953  | 2.021772939 | 0.098716683  |
| 9             | 58.08492928  | 106.2307944 | 131.6697247  | 1.927855711 | 0.071250445  |
| 10            | 2.3659306    | 2.209944751 | 0.234192     | 2.649006623 | 0.409836066  |
| 11            | 94.94607083  | 116.6024915 | 159.8377752  | 15.81395349 | 0.094517958  |
| 12            | 88.28072528  | 58.87169568 | 3.3613445    | 1.254275941 | 5.965714286  |
| 13            | 10.91431861  | 0.274273176 | 0.7010835    | 1.984564498 | 0.200501253  |
| 14            | 49.75340683  | 209.7297297 | 174.2071198  | 26.49233544 | 0.047687172  |
| 15            | 177.6249999  | 166.6465257 | 192.164179   | 33.09352518 | 2.906976744  |
| 16            | 15.8888889   | 79.12297426 | 20.44321332  | 1.085481682 | 0.074074074  |
| 17            | 0.0680735    | 7.356948229 | 24.07079642  | 1.255230126 | 0.042680324  |
| 18            | 75.48435165  | 218.3076923 | 142.3395446  | 2.73241206  | 0.040866367  |
| 19            | 136.1641392  | 178.7069864 | 95.49918165  | 44.61722488 | 2.429467085  |
| 20            | 50.55165504  | 116.7913938 | 66.80942184  | 15.59400231 | 0.393184797  |
| 21            | 155.2034884  | 145.4507042 | 138.7564766  | 8.844827586 | 0.235155791  |
| 22            | 28.22580648  | 46.34146341 | 10.6756757   | 4.389671362 | 3.127035831  |

|    |             |             |             |             |             |
|----|-------------|-------------|-------------|-------------|-------------|
| 23 | 4.176611    | 36.71919771 | 1.01884387  | 1.701507049 | 3.459993821 |
| 24 | 11.6766467  | 15.77060932 | 11.76724133 | 21.76322418 | 3.856749311 |
| 25 | 20.3773585  | 31.94029851 | 23.75838924 | 21.95845697 | 5.649122807 |
| 26 | 3.5767511   | 1.020092736 | 1.3348165   | 1.325966851 | 0.294985251 |
| 27 | 192.3275863 | 57.65281174 | 60.52173912 | 40.32051282 | 27.49354005 |
| 28 | 70.25316462 | 24.37710438 | 249.6280554 | 38.12351544 | 0.128205128 |
| 29 | 70.1960784  | 89.05660377 | 25.40322576 | 19.22196796 | 4.422604423 |
| 30 | 10.1515152  | 65.17799353 | 4.16909625  | 1.56046814  | 0.760043431 |
| 31 | 4.6214356   | 34.14634146 | 2.2288262   | 0.752508361 | 43.84020619 |
| 32 | 0.317029    | 0.430848772 | 0.0445038   | 0.045433894 | 22.00783546 |
| 33 | 2.3180593   | 3.337306317 | 0.3853565   | 0.392927308 | 74.72959685 |
| 34 | 0.1392758   | 2.529960053 | 1.0729614   | 0.124843945 | 5.886654479 |
| 35 | 0.0800213   | 0.057987823 | 6.33305064  | 0.026780932 | 0.137804318 |
| 36 | 3.0269058   | 76.17866005 | 6.6499373   | 1.5625      | 28.94197952 |
| 37 | 6.5767285   | 22.12765957 | 95.16339872 | 2.076677316 | 54.09984871 |
| 38 | 9.6091205   | 13.7973138  | 7.8172589   | 0.528169014 | 6.052173913 |
| 39 | 0.2113048   | 7.516848108 | 2.1621622   | 0.057240985 | 6.263213531 |
| 40 | 8.3243243   | 36.33170732 | 3.3386328   | 0.090415913 | 4.566635601 |
| 41 | 0.2868617   | 8.722566123 | 0.3757829   | 0.162601626 | 5.660377358 |
| 42 | 1.7816092   | 99.46517413 | 17.6705049  | 0.331785003 | 54.55555556 |
| 43 | 0.1757469   | 1.700404858 | 0.0765697   | 0.083056478 | 0.182815356 |
| 44 | 0.2917153   | 57.31958763 | 7.0762479   | 0.115473441 | 2.385861561 |
| 45 | 0.3875969   | 83.62249762 | 15.6981787  | 0.447427293 | 7.983870968 |

| <b>Number</b> | <b>Risk_score<br/>calculated<br/>based on the<br/>prognostic<br/>model</b> | <b>Risk_group<br/>classified by<br/>median of the<br/>Risk_score</b> |
|---------------|----------------------------------------------------------------------------|----------------------------------------------------------------------|
| 1             | 6.405905519                                                                | Low                                                                  |
| 2             | 89.22697912                                                                | High                                                                 |
| 3             | 40.38555747                                                                | High                                                                 |
| 4             | 22.66747653                                                                | High                                                                 |
| 5             | 4.681289819                                                                | Low                                                                  |
| 6             | 55.76020781                                                                | High                                                                 |
| 7             | 3.475132418                                                                | Low                                                                  |
| 8             | 50.48314058                                                                | High                                                                 |
| 9             | 58.13824309                                                                | High                                                                 |
| 10            | 0.719117674                                                                | Low                                                                  |

|    |             |      |
|----|-------------|------|
| 11 | 71.12415354 | High |
| 12 | 8.054313658 | Low  |
| 13 | 0.561664277 | Low  |
| 14 | 88.55926974 | High |
| 15 | 90.60491768 | High |
| 16 | 16.46872565 | Low  |
| 17 | 9.349681357 | Low  |
| 18 | 75.05231388 | High |
| 19 | 60.38640035 | High |
| 20 | 39.00996041 | High |
| 21 | 66.19069662 | High |
| 22 | 9.660919623 | Low  |
| 23 | 4.795670496 | Low  |
| 24 | 9.010114249 | Low  |
| 25 | 15.01403716 | Low  |
| 26 | 0.767256079 | Low  |
| 27 | 32.76800867 | High |
| 28 | 94.61223446 | High |
| 29 | 21.89590865 | Low  |
| 30 | 9.272311431 | Low  |

Box S1 M2 macrophage-related genes identified using WGCNA

Gene  
ACKR3  
ACP5  
ADA2  
ADAMDEC1  
ADAMTS2  
ADGRA2  
AEBP1  
AIF1  
AIM2  
AKR1B1  
ANTXR1  
ANXA5  
APLNR  
APOL1  
APOL2  
APOL6  
ARID5B  
ARL4C  
ASAH1  
ATP6V1B2  
B2M  
BATF  
BATF2  
BCL9L  
BGN  
BIRC3  
BST2  
BTN3A1  
C1QA  
C1QB  
C1QC  
C1QTNF1  
C1R  
C1S  
C3  
C5orf15  
CALU  
CASP1  
CCDC3  
CCL11  
CCL18  
CCL2  
CCL4  
CCL5  
CCL8  
CCN1  
CCN2  
CD14  
CD163  
CD2  
CD248

CD274  
CD276  
CD38  
CD3E  
CD4  
CD40  
CD47  
CD74  
CD8A  
CD93  
CD99  
CDC42SE2  
CDH5  
CEBPB  
CERCAM  
CFD  
CHPF  
CIC  
CLEC11A  
CLEC14A  
CLSTN3  
CMTM3  
CNN2  
COL10A1  
COL12A1  
COL15A1  
COL16A1  
COL18A1  
COL1A1  
COL1A2  
COL3A1  
COL4A1  
COL4A2  
COL5A1  
COL5A2  
COL6A1  
COL6A2  
COL6A3  
COL8A1  
COTL1  
CPA3  
CPXM1  
CRIP2  
CSF1  
CSF1R  
CTDSP1  
CTHRC1  
CTSC  
CTSK  
CTSL  
CTSS  
CX3CL1  
CXCL10  
CXCL11

CXCL9  
CYBB  
CYGB  
DAB2  
DBN1  
DCN  
DDX60  
DIO2  
DNASE2  
DRAM1  
DTX3L  
DUT  
ECE1  
EFEMP1  
EFEMP2  
ELK3  
ENG  
EPAS1  
EPSTI1  
ERAP2  
ESAM  
ETV7  
F2R  
F2RL2  
FAM20C  
FBLIM1  
FBLN2  
FBN1  
FBX06  
FCER1G  
FCGR2A  
FCGR3A  
FN1  
FNDC1  
FNDC3B  
FOLR2  
FOSL2  
FPR3  
FSTL1  
FSTL3  
FUCA1  
GAA  
GALNT2  
GASK1B  
GBP1  
GBP2  
GBP4  
GBP5  
GGT5  
GIMAP4  
GIMAP7  
GLUL  
GM2A  
GNA12

GNAI2  
GNLY  
GPC1  
GPNMB  
GPX1  
GPX3  
GPX7  
GRAMD1A  
GZMA  
GZMB  
GZMH  
H6PD  
HAPLN3  
HEG1  
HERPUD1  
HLA\_A  
HLA\_B  
HLA\_C  
HLA\_DMA  
HLA\_DMB  
HLA\_DOA  
HLA\_DPA1  
HLA\_DPB1  
HLA\_DQB1  
HLA\_DRA  
HLA\_DRB1  
HLA\_DRB5  
HLA\_E  
HLA\_F  
HMOX1  
HSD3B7  
HTRA1  
HTRA3  
ICAM1  
ID3  
IDO1  
IFI16  
IFI35  
IFI44  
IFI44L  
IFIH1  
IFIT1  
IFIT3  
IFITM1  
IFITM3  
IGFBP3  
IGFBP5  
IL18BP  
IL1R1  
IL2RB  
IL2RG  
IL32  
INHBA  
IRF1

IRF2  
IRF8  
ISLR  
ITGAV  
ITGB5  
JAK2  
JUNB  
KDM6B  
KIRREL1  
KLF13  
KLF6  
LAMB1  
LAP3  
LBH  
LEPROT  
LGALS9  
LGMN  
LIPA  
LITAF  
LOX  
LOXL1  
LOXL2  
LRP1  
LRRC32  
LTBP2  
LUM  
LXN  
LY96  
MAFB  
MAGED2  
MAN2B1  
MAP1LC3B  
MARCKS  
MEDAG  
MFAP2  
MFAP5  
MFGE8  
MMP11  
MMP12  
MMP14  
MMP2  
MNDA  
MRC2  
MT\_ATP8  
MT\_C03  
MT\_CYB  
MX1  
MXRA5  
MXRA8  
MYH10  
MYH9  
NBL1  
NCOR2  
NDST1

NES  
NFIL3  
NID1  
NINJ1  
NKG7  
NMI  
NNMT  
NOTCH3  
NPC2  
NR4A1  
NTN4  
NUB1  
OAF  
OAS1  
OAS2  
OAS3  
OASL  
ODF3B  
OLFML2B  
OPTN  
OR2I1P  
OSMR  
PARP14  
PARP9  
PCOLCE  
PDGFRA  
PDGFRB  
PDPN  
PECAM1  
PHC2  
PIM2  
PKN1  
PLA2G7  
PLAAT4  
PLAT  
PLBD2  
PLD3  
PLEKHM2  
PLEKHS1  
PLSCR1  
PLTP  
PLVAP  
PLXDC2  
PML  
PODXL  
POSTN  
PPP1R18  
PPT1  
PRPS2  
PSAP  
PSMA4  
PSMA5  
PSMB10  
PSMB8

PSMB9  
PSME1  
PSME2  
PXDC1  
PXDN  
RAB31  
RAMP2  
RAMP3  
RARRES2  
RCN3  
RGS10  
RHBDF2  
RIPK2  
RNASE6  
RNF19B  
RNF213  
RSAD2  
SAMD9L  
SAMHD1  
SCARF2  
SCPEP1  
SECTM1  
SELENON  
SELPLG  
SEPTIN11  
SERPINE1  
SERPINE2  
SERPINF1  
SERPINH1  
SFRP2  
SFRP4  
SFXN3  
SH2B3  
SH3PXD2A  
SH3PXD2B  
SHC1  
SIRPA  
SLAMF7  
SLC2A3  
SLC6A6  
SLC9A3R2  
SLCO2A1  
SLCO2B1  
SMIM3  
SMPD1  
SNX6  
SOCS3  
SORBS3  
SOX18  
SPARC  
SPON2  
SPRY1  
SPSB1  
SRGN

STAT1  
STAT2  
STING1  
SULF1  
SULF2  
SUSD6  
TAP1  
TAPBP  
TAPBPL  
TBC1D2  
TCN2  
TGFB1  
TGFB1  
TGM2  
THBS1  
THBS2  
THY1  
TIMP1  
TIMP2  
TMEM119  
TMEM127  
TMEM158  
TMEM184B  
TMEM204  
TNFAIP1  
TNFRSF1A  
TNFRSF1B  
TNFSF10  
TNKS1BP1  
TPM4  
TPP1  
TRAM2  
TREM2  
TRIM21  
TRIM22  
TSPAN9  
TYMP  
TYROBP  
UBA7  
UBE2L6  
UBTD1  
UNC5B  
VAMP3  
VAMP5  
VASN  
VAT1  
VCAN  
VIM  
VSIG4  
VWF  
WARS1  
WNT5A  
YWHAH
